1 **A conserved morphogenetic mechanism for epidermal**  
2 **ensheathment of nociceptive sensory neurites**

3  
4 Nan Jiang<sup>1</sup>, Jeffrey P. Rasmussen<sup>2†</sup>, Joshua A. Clanton<sup>2</sup>, Marci F. Rosenberg<sup>2</sup>, Kory P.  
5 Luedke<sup>1</sup>, Mark R. Cronan<sup>5</sup>, Ed Parker<sup>3</sup>, Hyeon-Jin Kim<sup>4</sup>, Joshua C. Vaughan<sup>4</sup>, Alvaro  
6 Sagasti<sup>2</sup>, Jay Z. Parrish<sup>1\*</sup>

7  
8 <sup>1</sup>Department of Biology, University of Washington, Seattle, WA 98195

9 <sup>2</sup>Department of Molecular, Cell, and Developmental Biology, University of California Los  
10 Angeles, Los Angeles, CA 90095

11 <sup>3</sup>Department of Ophthalmology, University of Washington, Seattle, WA 98195

12 <sup>4</sup>Department of Chemistry and Department of Department of Physiology and  
13 Biophysics, University of Washington, Seattle, WA 98195

14 <sup>5</sup>Department of Molecular Genetics and Microbiology, Duke University, Durham, NC  
15 27710

16 <sup>†</sup>Current address: Department of Biology, University of Washington, Seattle, WA 98195

17 <sup>\*</sup>Correspondence should be addressed to J.Z.P ([jzp2@uw.edu](mailto:jzp2@uw.edu))

## 23 **Abstract**

24 Interactions between epithelial cells and neurons influence a range of sensory  
25 modalities including taste, touch, and smell. Vertebrate and invertebrate  
26 keratinocytes/keratinocyte-like epidermal cells ensheath peripheral arbors of  
27 somatosensory neurons, including nociceptors, yet the developmental origins and  
28 functional roles of this ensheathment are largely unknown. Here, we describe an  
29 evolutionarily conserved morphogenetic mechanism for epidermal ensheathment of  
30 somatosensory neurites. We found that somatosensory neurons in *Drosophila* and  
31 zebrafish induce formation of epidermal sheaths, which wrap neurites of different types  
32 of neurons to different extents. Neurites induce formation of plasma membrane  
33 phosphatidylinositol 4,5-bisphosphate microdomains at nascent sheaths, followed by a  
34 filamentous actin network, and recruitment of junctional proteins that likely form  
35 autotypic junctions to seal sheaths. Finally, blocking epidermal sheath formation  
36 destabilized dendrite branches and reduced nociceptive sensitivity in *Drosophila*.  
37 Epidermal somatosensory neurite ensheathment is thus a deeply conserved cellular  
38 process that contributes to the morphogenesis and function of nociceptive sensory  
39 neurons.

## 40 **Introduction**

41 The innervation patterns of cutaneous receptors determine our responses to external  
42 stimuli. Many types of cutaneous receptors form specialized terminal structures with  
43 epithelial cells that contribute to somatosensation (Owens and Lumpkin 2014;  
44 Zimmerman, Bai, and Ginty 2014). For example, some low threshold mechanoreceptor  
45 afferents form synapse-like contacts with Merkel cells (Mihara et al. 1979), which  
46 directly respond to mechanical stress and tune gentle touch responses (Maksimovic et  
47 al. 2014; Woo et al. 2014). Similarly, afferent interactions with radially packed Schwann  
48 cell-derived lamellar cells in Pacinian corpuscles facilitate high frequency sensitivity  
49 (Loewenstein and Skalak 1966). By contrast, although various types of free nerve  
50 endings, including nociceptive C-fibers, course over and insert into keratinocytes, much  
51 less is known about the anatomy of keratinocyte-sensory neuron coupling, or the  
52 mechanisms by which keratinocytes modulate sensory neuron structure and function.  
53 Recent findings that keratinocytes express sensory channels (Peier et al. 2002; Bidaux  
54 et al. 2015; Y. Chen et al. 2016), respond to sensory stimuli (Koizumi et al. 2004; Xu et  
55 al. 2006; Moehring et al. 2018), release compounds that modulate sensory neuron  
56 function (Woolf et al. 1997; Koizumi et al. 2004; Moehring et al. 2018), and can drive  
57 sensory neuron firing (Baumbauer et al. 2015; Pang et al. 2015), underscore the  
58 importance of understanding the coupling of keratinocytes to sensory neurons.

59 Anatomical studies have demonstrated that peripheral arbors of some  
60 mammalian somatosensory neurons insert into keratinocytes, not just intercalate  
61 between them (Munger 1965; Cauna 1973). Several factors have hindered  
62 characterization of sensory neuron-keratinocyte interactions in mammalian systems,

63 including region-specific differences in sensory neuron-epidermis interactions  
64 (Kawakami, Ishihara, and Mihara 2001; Liu et al. 2014), a still-growing repertoire of  
65 neuronal cell types that innervate the epidermis (Usoskin et al. 2015; Nguyen et al.  
66 2017), and a shortage of markers that label discrete populations of sensory neurons.  
67 Peripheral arbors of somatosensory neurons are likewise inserted into keratinocytes or  
68 keratinocyte-like epidermal cells in invertebrate and non-mammalian vertebrate model  
69 systems, making these promising settings for characterizing epithelial cell-neurite  
70 interactions. Notably, portions of *Drosophila melanogaster* larval nociceptive class IV  
71 dendrite arborization (da) neuron dendrites and *Danio rerio* (zebrafish) larval trigeminal  
72 and Rohon-Beard (RB) sensory axons become ensheathed by epidermal cells (Han et  
73 al. 2012; Kim et al. 2012; O'Brien et al. 2012), and studies in these systems have  
74 provided insight into the structure and possible function of this epidermal ensheathment  
75 of free nerve endings.

76 *Drosophila* and zebrafish epidermal cells wrap sensory neurites by extending  
77 membranes around the entire circumference of the sensory neurite. The wrapping  
78 epidermal membranes are tightly apposed to one another and the ensheathed neurites,  
79 embedding them inside a mesaxon-like structure (Whitewar and Moate 1998; Han et al.  
80 2012; Kim et al. 2012; O'Brien et al. 2012). A similar structure has been documented for  
81 ensheathed somatosensory neurites in *Caenorhabditis elegans* and humans (Cauna  
82 1973; Chalfie and Sulston 1981), suggesting that ensheathment by epidermal cells is a  
83 conserved feature of sensory endings. The most extensive ultrastructural analysis of  
84 these structures suggests that the sensory neurites can be continuously ensheathed  
85 over extended lengths of the arbor, stretching several micrometers or more (O'Brien et

86 al. 2012). Structurally, the interaction between keratinocytes and somatosensory  
87 neurites is reminiscent of ensheathment of peripheral axons by nonmyelinating  
88 Schwann cells in Remak bundles, suggesting that keratinocyte ensheathment may  
89 likewise regulate sensory neuron structure (S. Chen et al. 2003) and function (Orita et  
90 al. 2013; Faroni et al. 2014).

91         Although the extent and distribution of sensory neurite-epidermal ensheathment  
92 have not been systematically analyzed, many of the documented instances involve  
93 highly branched mechanosensory and/or nociceptive neurons. In *Drosophila*, epidermal  
94 ensheathment has been linked to control of branching morphogenesis in two ways.  
95 First, nociceptive class IV dendrite arborization (c4da) neurons are largely restricted to a  
96 two-dimensional plane along the basal surface of epidermal cells to potentiate contact-  
97 dependent repulsion and hence tiling (Han et al. 2012; Kim et al. 2012). However,  
98 portions of c4da neurons are apically shifted and ensheathed inside the epidermis,  
99 allowing for dendrites of other da neurons to innervate the unoccupied basal space and  
100 hence “share” the territory (Tenenbaum et al. 2017). Second, epidermal ensheathment  
101 appears to regulate dendrite branching activity, as mutation of the microRNA *bantam*,  
102 which regulates dendrite-epidermis interactions (Jiang et al. 2014), or knockdown of  
103 *coracle* (*cora*), which encodes a band 4.1-related protein required for sheath formation  
104 (Tenenbaum et al. 2017), each increase dendrite branching. Although these studies  
105 provide the first signs that epidermal ensheathment plays key roles in somatosensory  
106 neuron development, the cellular basis and functional consequences of this sensory  
107 neuron-epidermis coupling remain to be determined.

108           Here, we characterized the cellular events involved in formation of epidermal  
109    ensheathment of somatosensory neurites in *Drosophila* and zebrafish. First, we  
110    identified a series of reporters that accumulate at epidermal sites of somatosensory  
111    dendrite ensheathment in *Drosophila*, demonstrating that sheaths form at specialized  
112    membrane domains and providing markers for *in vivo* tracking of the sheaths.  
113    Remarkably, epidermal sheaths are labeled by similar markers in zebrafish, suggestive  
114    of a conserved molecular machinery for ensheathment. Using these reporters, we found  
115    that epidermal sheaths in *Drosophila* and zebrafish wrap different types of neurons to  
116    different extents and that somatosensory neurons are required for formation and  
117    maintenance of epidermal sheaths. Finally, we found that blocking epidermal sheath  
118    formation led to exuberant dendrite branching and branch turnover, as well as reduced  
119    nociceptive sensitivity in *Drosophila*. Altogether, these studies demonstrate that  
120    epidermal ensheathment of somatosensory neurons by keratinocytes/keratinocyte-like  
121    cells is a deeply conserved cellular process that plays key roles in the morphogenesis  
122    and function of nociceptive sensory neurons.

123

## 124    **Results**

### 125    **PIP2 in epithelial cells is enriched at sites of *Drosophila* dendrite ensheathment**

126    Recent studies demonstrate that large portions of *Drosophila* c4da dendrite arbors are  
127    ensheathed by the epidermis (Tenenbaum et al. 2017; Jiang et al. 2018). To gain a high  
128    resolution view of this ensheathment over extended length scales we subjected  
129    *Drosophila* third instar larvae to serial block-face scanning electron microscopy (SBF-  
130    SEM) (Denk and Horstmann 2004). Consistent with prior TEM studies which provided a

131 snapshot of these sheath structures (Han et al. 2012; Kim et al. 2012; Jiang et al. 2014),  
132 in individual sections we observed dendrites embedded inside epithelial cells and  
133 connected to the basal epithelial surface by thin, tubular invaginations formed by close  
134 apposition of epidermal membranes (Figure 1A). To determine if c4da dendrites were  
135 continuously ensheathed in these mesaxon-like structures, we followed individual  
136 dendrites from the site of insertion into the epidermis through EM volumes of abdominal  
137 segments cut in 60 nm sections along the apical-basal axis. We found that dendrites  
138 were embedded in epithelial cells over extended length scales (often several microns or  
139 more), that dendrites were continuously embedded in these mesaxon-like structures  
140 with elongated tubular invaginations, and that the epidermal membranes comprising the  
141 walls of these tubular invaginations were tightly juxtaposed and electron-dense along  
142 their entire length (Figure 1B, 1C). Each of these structural elements was previously  
143 described for the ensheathment of peripheral axons by keratinocytes in zebrafish  
144 (O'Brien et al. 2012), suggesting that the mechanism of epidermal somatosensory  
145 neuron ensheathment may be conserved between invertebrates and vertebrates.

146 We hypothesized that formation of dendrite sheaths likely involves recruitment of  
147 factors that create specialized membrane domains. To identify epithelial membrane-  
148 associated markers that preferentially localize to sites of dendrite ensheathment, we  
149 used the Gal4-UAS system to selectively express GFP-tagged markers in the epidermis  
150 of *Drosophila* larvae also expressing the c4da-specific marker *ppk-CD4-tdTomato* and  
151 assayed for GFP enrichment at sites of dendrite-epidermis apposition. Whereas the  
152 single-pass transmembrane marker CD4-GFP broadly labeled epithelial membranes  
153 and showed no obvious enrichment at sites of dendrite contact (Figure 1D, 1E), our

154 screen of ~90 GFP-tagged membrane- and cytoskeleton-associated proteins yielded  
155 several markers that were enriched in basal domains of epithelial cells adjacent to c4da  
156 dendrites (Figure 1 – figure supplement 1A, Table S1).

157 First, we screened a collection of membrane markers to determine whether  
158 ensheathment occurs at specialized membrane domains. Among these markers, the  
159 phosphatidylinositol 4,5-bisphosphate (PIP<sub>2</sub>) probe PLC<sup>δ</sup>-PH-GFP (Várnai and Balla  
160 1998; Verstreken et al. 2009) exhibited the most extensive enrichment at sites of  
161 epidermal dendrite ensheathment. In epithelial cells of third instar larvae, PLC<sup>δ</sup>-PH-GFP  
162 accumulated at epithelial cell-cell junctions, punctate patches, and elongated  
163 filamentous membrane microdomains adjacent to c4da dendrites (Figure 1F-1K). These  
164 PLC<sup>δ</sup>-PH-GFP-positive membrane microdomains were also labeled by antibodies to the  
165 *Drosophila* 4.1 protein cora (Figure 1 – figure supplement 1B), a previously described  
166 marker of epidermal dendrite sheaths (Kim et al. 2012; Tenenbaum et al. 2017),  
167 demonstrating that these PLC<sup>δ</sup>-PH-GFP-positive microdomains correspond to  
168 epidermal dendrite sheaths. In addition to labeling epidermal sheaths, anti-cora  
169 immunostaining labels glial sheaths, which wrap axons, cell bodies and proximal  
170 dendrites segments of sensory neurons, however, epidermal PLC<sup>δ</sup>-PH-GFP was not  
171 enriched at these sites of glial ensheathment. PLC<sup>δ</sup>-PH-GFP-positive domains often  
172 appeared wider than c4da dendrites (Figure 1H-1I), suggesting that PLC<sup>δ</sup>-PH-GFP  
173 labels the entire sheath structure, including the convoluted tubular extensions to the  
174 basal surface of the epidermis.

175 Since many of the sheath structures are smaller than the axial resolution of a  
176 standard confocal microscope, we used expansion microscopy (ExM) to gain a 3-



177 dimensional view of epidermal PLC<sup>δ</sup>-PH-GFP localization adjacent to c4da dendrites  
178 (Jiang et al. 2018). We found that PLC<sup>δ</sup>-PH-GFP labeled epidermal structures that  
179 extend from the most apical extent of dendrite insertion to the basal surface of individual  
180 epithelial cells (Figure 1J-1K), suggesting that PLC<sup>δ</sup>-PH-GFP indeed labels the entire  
181 sheath structure. PLC<sup>δ</sup>-PH-GFP was locally depleted at branch points (Figure 1J, white  
182 arrows; Figure 1 – figure supplement 1D), consistent with prior observations that  
183 dendrite branch points are less extensively ensheathed than dendrite shafts  
184 (Tenenbaum et al. 2017). Point mutations in the PH domain of PLC<sup>δ</sup>-PH-GFP that  
185 abrogate PIP2 binding (Várnai and Balla 1998; Verstreken et al. 2009) prevented  
186 accumulation of PLC<sup>δ</sup>-PH-GFP at sites of ensheathment (Figure 1 – figure supplement  
187 1C), and we found similar patterns of accumulation at sheaths by other PIP2-binding  
188 proteins, including OSH2-PH-GFP (Figure 1 – figure supplement 1E), which binds  
189 phosphatidylinositol 4-phosphate and PIP2 with similar affinities (Hardie et al. 2015).  
190 Together, these observations demonstrate that epithelial sites of dendrite ensheathment  
191 are enriched in PIP2.

192 PIP2 is a negatively charged phospholipid that recruits a variety of proteins to the  
193 plasma membrane to regulate vesicular trafficking and actin remodeling (De Craene et  
194 al. 2017), and epithelial cells in *Drosophila* and zebrafish phagocytose peripheral arbors  
195 of sensory neurons after injury and during pruning (Han et al. 2014; Rasmussen et al.  
196 2015). We therefore examined whether endocytic, cytoskeletal and/or phagocytic  
197 markers also accumulated at sites of epidermal ensheathment. While we observed no  
198 enrichment of mature phagocytic markers prior to sheath formation or in mature  
199 sheaths, we identified a number of PIP2-linked markers that together provide a

200 framework for sheath assembly (Table S1). First, we found that a GFP-tagged version  
201 of the endocytic adaptor dArf6 was enriched at sites of dendrite ensheathment (Figure  
202 1L-1M). Arf6 regulates clathrin-dependent endocytosis as well as trafficking of recycling  
203 endosomes to the plasma membrane (D'Souza-Schorey and Chavrier 2006), and the  
204 Arf6 effector phosphatidylinositol4-monophosphate 5-kinase catalyzes plasma  
205 membrane synthesis of PIP2 (Honda et al. 1999). Thus, dArf6 and endocytosis may  
206 contribute to PIP2 accumulation at sites of sheath formation. Second, we found that a  
207 GFP-tagged version of the GTPase Rho1, which promotes filamentous actin (F-actin)  
208 assembly, and the F-actin probe GMA-GFP accumulated at sites of epidermal sheath  
209 formation (Figure 1N-1Q), consistent with the fact that PIP2 stimulates actin assembly  
210 (Yin and Janmey 2003). Finally, in addition to the septate junction marker cora (Figure  
211 1R-1S), which was previously identified as a component of epidermal sheaths (Kim et  
212 al. 2012; Tenenbaum et al. 2017), other septate junction markers, including GFP-  
213 Neurexin-IV and Neuroglian-GFP, as well as adherens junction markers, including  
214 Armadillo-GFP and Shotgun-GFP, *Drosophila* homologues of  $\beta$ -catenin and E-cadherin,  
215 respectively, accumulated at epidermal dendrite sheaths (Figure 1T-1U, Figure 1 –  
216 figure supplement 1F, Table S1). PIP2 binding regulates membrane association of 4.1R  
217 (An et al. 2006) and the maturation of adherens junctions via exocyst-dependent  
218 recruitment of E-cadherin (Xiong et al. 2012), thus PIP2 may promote sheath maturation  
219 via recruitment of these proteins.

220

221 **Epidermal sheaths are molecularly similar in the larval skin of *Drosophila* and**  
222 **zebrafish**

223 Sensory axons terminals in the epidermis of zebrafish larvae and adults are ensheathed  
224 by the apical membranes of epidermal keratinocytes (Figure 2A) (O'Brien et al. 2012),  
225 and ensheathment channels have also been seen in adult fish (Whitewar and Moate  
226 1998; Rasmussen, Vo, and Sagasti 2018). These axonal ensheathment channels are  
227 remarkably similar at the ultrastructural level to the channels wrapping somatosensory  
228 dendrites in *Drosophila* larvae. By examining the localization of fluorescent reporters for  
229 the membrane, cytoskeleton, and cell junctions in basal epidermal cells of zebrafish, we  
230 found that zebrafish and *Drosophila* epidermal sheaths are also similar at the molecular  
231 level.

232         At early stages, before sensory axons have grown into the skin, a reporter for  
233 PIP2 (PLC<sup>δ</sup>-PH-GFP) localized at cell-cell junctions and sparse microdomains near the  
234 apical surface (Figure 2B). After axons grew into the skin, PLC<sup>δ</sup>-PH-GFP was enriched  
235 in continuous, linear apical microdomains, closely associated with axons of both larval  
236 zebrafish somatosensory neuron cell types, trigeminal and Rohon-Beard neurons  
237 (Figure 2C, H). Farnesylated GFP (CaaX-GFP) similarly localized to microdomains  
238 below axons, consistent with the notion that axons are associated with specialized  
239 membrane domains in skin cells (Figure 2 – figure supplement 1). Reporters for F-actin  
240 (LifeAct-GFP and Utrophin-GFP) were also enriched at these axon-associated domains  
241 (Figure 2D, 2E and data not shown), implying that actin may play a role in the  
242 morphogenesis of epidermal sheaths.

243         Electron microscopy of zebrafish epidermal sheaths revealed that autotypic  
244 junctions appear to seal the “neck” of these sheaths (O'Brien et al. 2012). To determine  
245 the molecular nature of these junctions, we used  $\alpha$ -catenin and E-cadherin in-frame,

246 functional gene traps (Trinh et al. 2011), and a  $\beta$ -catenin antibody to visualize adherens  
247 junctions; transiently expressed C-terminally-tagged Desmocolin-like 2 and  
248 Desmoplakin BAC reporters to visualize desmosomes; and a gene trap of Jupa [a.k.a.  
249 Plakoglobin/ $\gamma$ -catenin] (Trinh et al. 2011), a protein found in both types of junctions.  
250 Reporters for both adherens junction and desmosome proteins localized to apical  
251 domains directly above axons, suggesting that both types of junctions associate with  
252 epidermal sheaths (Figure 2F-G, I; Figure 2 – figure supplement 1B-F). Consistent with  
253 the observation that autotypic junctions are only visible in some TEM images, some of  
254 the fluorescent junctional reporters ( $\alpha$ -catenin, Jupa) appeared as dotted lines along the  
255 length of axons (Figure 2G, Figure 2 –figure supplement 1D), suggesting that they form  
256 spot junctions, rather than continuous belts.

257 Taken together, our results demonstrate similarity in ultrastructure and molecular  
258 composition of *Drosophila* and zebrafish epidermal sheaths, suggesting that these  
259 structures form via an evolutionarily conserved pathway.

260

### 261 **Ensheathment is specific to somatosensory neuron subtypes**

262 To determine if epidermal sheaths are specific to somatosensory neurons in zebrafish,  
263 or can occur at any site of axon-basal skin cell contact, we mislocalized axons of  
264 another sensory neuron type to the skin. Axons of posterior Lateral Line neurons (pLL)  
265 are usually separated from the skin by ensheathing Schwann cells, forming a nerve just  
266 internal to the epidermis. Treating animals with an inhibitor of the Neuregulin receptor  
267 ErbB3b, which is required for Schwann cell development, causes the entire bundle of  
268 pLL axons to directly contact the basal membrane of basal skin cells (Raphael, Perlin,

269 and Talbot 2010). This treatment created a notable indentation in the basal membrane,  
270 but PLC<sup>δ</sup>-PH-GFP was not enriched in these domains (Figure 2J, 2K), indicating either  
271 that somatosensory axons can uniquely promote the formation of PIP2-rich  
272 microdomains, or that only the apical membranes of basal keratinocytes are competent  
273 to form these domains.

274         Next, we examined whether PIP2-rich microdomains formed around all  
275 somatosensory neurons or preferentially formed around particular subsets of  
276 somatosensory neurons. In *Drosophila* larvae, the vast majority of PLC<sup>δ</sup>-PH-GFP-  
277 positive sheath structures (94.8 ± 7.8%, n = 8 abdominal hemisegments) were present  
278 at sites occupied by c4da sensory dendrites (Figure 3A-3C), yet a subset of PLC<sup>δ</sup>-PH-  
279 GFP-positive sheaths were not apposed by these dendrites (Figure 1G), suggesting that  
280 other classes of da neurons were also ensheathed. To investigate this possibility, we  
281 expressed membrane-targeted RFP in different classes of somatosensory neurons and  
282 visualized sheaths via epidermal expression of *UAS-PLC<sup>δ</sup>-PH-GFP* or anti-cora  
283 antibody staining. Among the multi-dendritic da neurons we found that nociceptive c4da  
284 neurons exhibited the most extensive ensheathment, mechanosensitive and  
285 thermosensitive c3da and c2da neurons exhibited an intermediate level of  
286 ensheathment, and proprioceptive c1da neurons exhibited very little ensheathment  
287 (Figure 3D-3F). Thus, different morphological and functional classes of somatosensory  
288 neurons are ensheathed by the epidermis to different extents.

289         Although zebrafish somatosensory neurons have not been as clearly categorized  
290 into subtypes as *Drosophila* da neurons, similar to *Drosophila*, different individual  
291 sensory neurons in zebrafish were ensheathed to different degrees (Figure 3G-3K). The

292 degree of ensheathment appeared to correlate with axon arbor complexity: axons with  
293 fewer branches associated with  $\alpha$ -catenin along a greater proportion of their length (up  
294 to ~80% axon length) than highly complex axons (<30% axon length). This observation  
295 implies that the degree of axon ensheathment may be a subtype-specific feature in  
296 zebrafish, like in *Drosophila*.

297

### 298 **Sheaths are not pre-patterned in the epidermis**

299 Since epidermal sheaths occur almost exclusively at sites occupied by sensory neurites,  
300 we investigated if an epidermal pre-pattern dictates sites of sheath formation or,  
301 alternatively, if neuronal signals induce epidermal sheath formation. To differentiate  
302 between these possibilities, we first monitored the timing of arrival and distribution of  
303 epidermal sheath markers throughout *Drosophila* larval development. Whereas *c4da*  
304 dendrites tile the larval body wall by ~36 hours after egg laying (AEL) (Parrish et al.  
305 2009), PLC <sup>$\delta$</sup> -PH-GFP first accumulated in isolated patches adjacent to dendrites at 48 h  
306 AEL (Figure 4A-4C, 4G). Epidermal PLC <sup>$\delta$</sup> -PH-GFP did not co-occur with large portions  
307 of the dendrite arbor until after 96 h AEL (Figure 4D-4F, 4G), a time point when  
308 dendrites are internalized in epithelial cells (Jiang et al. 2014, 2018). Furthermore, time-  
309 lapse imaging demonstrated that PLC <sup>$\delta$</sup> -PH-GFP enrichment at sheaths is not transient;  
310 once formed, epidermal sheaths persist or grow, but rarely retract (Figure 4H, Figure 4  
311 – figure supplement 1). Finally, although PLC <sup>$\delta$</sup> -PH-GFP and *cora* extensively co-  
312 localized and labeled a nearly identical population of sheaths by the end of larval  
313 development (95.7  $\pm$  5.8 % of *cora*-positive sheaths are PLC <sup>$\delta$</sup> -PH-GFP positive; 88.7  $\pm$   
314 7.4% of PLC <sup>$\delta$</sup> -PH-GFP-positive sheaths are *cora*-positive; n = 8 hemisegments), *cora*

315 accumulation lagged behind PLC $\delta$ -PH-GFP (Figure 4G, Figure 4 – figure supplement  
316 2). Thus, although PLC $\delta$ -PH-GFP accumulation marks an earlier stage in sheath  
317 formation than cora recruitment, we found no evidence that a pre-pattern predicts the  
318 site of ensheathment.

319 In the course of our imaging we occasionally observed hemisegments lacking a  
320 c4da neuron. In such cases, epidermal PLC $\delta$ -PH-GFP failed to accumulate at sheaths,  
321 although PLC $\delta$ -PH-GFP accumulation at epithelial cell-cell junctions was comparable to  
322 neighboring segments containing c4da neurons, (Figure 4 – figure supplement 3). This  
323 observation suggested that dendritic signals induce formation of epidermal sheaths.

324

### 325 **Peripheral sensory neurites are required for sheath formation and maintenance**

326 To test the requirement for sensory neurons in epidermal sheath formation we used a  
327 genetic cell-killing assay in *Drosophila* to eliminate all c4da neurons and assayed for  
328 sheath formation using anti-cora immunostaining. Expressing the pro-apoptotic gene  
329 *reaper* in c4da neurons with two copies of the c4da-specific *ppk-Gal4* Gal4 driver  
330 (Grueber et al. 2003) resulted in fully penetrant death and clearance of c4da neurons  
331 but not other sensory neurons by the end of the first larval instar, prior to appearance of  
332 epithelial sheaths. Anti-cora staining of these larvae revealed that although a small  
333 number of sheaths were present adjacent to the remaining c2da and c3da neurons, the  
334 overall extent of ensheathment was significantly reduced (cora-positive sheath length  
335 per mm<sup>2</sup> of body wall:  $2.72 \pm 0.64$  mm following c4da *reaper* expression,  $11.44 \pm 1.81$   
336 mm in sibling controls without *reaper*; mean  $\pm$  sd, n = 8) (Figure 4I-4K). These results  
337 demonstrate that dendrite-derived signals induce sheath formation; such signals are

338 likely short-range signals, as sheaths form at sites directly apposed to dendrites. These  
339 results further suggest that modality-specific levels of ensheathment do not reflect  
340 competitive interactions between c4da and other da neurons for sheath formation, as  
341 the absence of c4da neurons did not potentiate sheath formation in spared neurons.

342       Next, we investigated the temporal requirement for dendrite-derived signals in  
343 epidermal sheath formation. Using a focused laser beam we ablated *Drosophila* c2da,  
344 c3da, and c4da neurons at 48 h AEL, prior to appreciable accumulation of sheath  
345 markers or appearance of sheaths in TEM sections (Jiang et al. 2014), and assayed for  
346 sheath formation at 120 h AEL using anti-cora immunostaining. Following this  
347 treatment, cora-positive sheaths did not form (Figure 4L-4N), suggesting that dendrite  
348 signals initiate sheath formation after 48 h AEL, the same timeframe when PLC<sup>δ</sup>-PH-  
349 GFP first accumulates at sites of dendrite contact. These results further demonstrate  
350 that different neuron classes have different capacities for ensheathment as removing all  
351 of the da neurons that are normally ensheathed did not potentiate c1da neuron  
352 ensheathment.

353       To examine if dendritic signals are likewise required for sheath maintenance we  
354 used a focused laser beam to sever the dorsal-anterior dendrites from a c4da neuron at  
355 108 h AEL, after epidermal sheaths had formed, and used time-lapse confocal  
356 microscopy to monitor effects on sheath maintenance in larvae expressing the sheath  
357 marker *UAS-PLCD-PH-Cerulean* (Figure 4O-4Q). By 12 h post-severing, both the c4da  
358 dendrites distal to the cut site and the epidermal sheaths that wrapped them had  
359 disappeared (Figure 4R-4T). By contrast, sheaths wrapping the spared dorsal-posterior  
360 portion of the c4da dendrite arbor, as well as sheaths that wrapped c2da/c3da neurons



361 in both the lesioned and unlesioned half of the hemisegment, persisted. Therefore,  
362 short-range dendrite-derived signals are required for both the formation and  
363 maintenance of epidermal sheaths.

364 To determine if, as in *Drosophila*, axons are required for the formation of  
365 epidermal sheaths in zebrafish, we examined sheath-associated reporters in larvae  
366 injected with a morpholino targeting *neurogenin 1 (neurog1)*, a manipulation that blocks  
367 somatosensory neuron development (Andermann, Ungos, and Raible 2002; Cornell and  
368 Eisen 2002; O'Brien et al. 2012). Basal cells in *neurog1* MO-treated animals lacked  
369 coherent PIP2-rich microdomains, apical accumulations of F-actin, and  $\alpha$ -catenin-  
370 containing autotypic junctions, demonstrating that epidermal sheaths are initiated by  
371 axons in zebrafish larvae (Figure 4U-4Z). As in *Drosophila*, axons were also required to  
372 maintain sheaths, since PIP2-rich microdomains disappeared soon after laser axotomy  
373 and axon degeneration (Figure 4AA).

374

### 375 **Zebrafish axonal sheaths and *Drosophila* dendritic sheaths form in a similar** 376 **sequence**

377 To determine the order of assembly of these sheath-associated proteins we first  
378 conducted a series of double-labeling and genetic epistasis analyses in *Drosophila*  
379 larvae. We simultaneously expressed the PIP2 marker *UAS-PLC<sup>δ</sup>-PH-Cerulean*  
380 together with either *UAS-dArf6-GFP* or *UAS-GMA-GFP* in the epidermis of larvae  
381 additionally expressing the c4da neuron marker *ppk-CD4-tdTomato* and monitored the  
382 timing of arrival of each marker at epidermal sheaths. From the earliest time-point that  
383 PIP2 enrichment was detectable at sheaths, we also detected dArf6-GFP enrichment,

384 albeit at a subset of PLC<sup>δ</sup>-PH-Cerulean-positive sheaths, suggesting that dArf6 is  
385 recruited to sheaths shortly after PIP2 enrichment (Figure 5A). By contrast, GMA-GFP  
386 labeling lagged behind PLC<sup>δ</sup>-PH-Cerulean (Figure 5B), appearing on a comparable  
387 timescale as *cora*. Epidermal sheath assembly therefore appears to proceed via  
388 separable steps.

389 Examining ensheathment channel-associated markers at four stages of zebrafish  
390 development revealed a similar sequence of events. As in *Drosophila*, we found that  
391 membrane reporters appeared near zebrafish axons before F-actin or junctional  
392 reporters (Figure 5C). PIP2-rich microdomains frequently apposed axons by 32 hpf,  
393 before ensheathment channels were evident ultrastructurally (O'Brien et al. 2012). This  
394 observation suggests that the formation of PIP2-positive membrane microdomains is an  
395 early step in sheath morphogenesis in zebrafish, as in *Drosophila*. Indeed, time-lapse  
396 confocal microscopy demonstrated that these domains formed during development just  
397 minutes after an axonal growth cone passed through that region (Figure 5 – figure  
398 supplement 1).

399 To assess the relationship between these sheath-associated proteins, we  
400 knocked down lipids or proteins associated with sheaths in *Drosophila*. Specifically, to  
401 deplete phosphatidylinositol 4-phosphate and PIP2, we expressed RNAi targeting the  
402 phosphatidylinositol 4-kinase gene *PI4KIIIa*; to block endocytosis, we expressed a  
403 dominant negative version of *shibire* (*shi*<sup>DN</sup>), which is defective in GTP  
404 binding/hydrolysis (Damke et al. 2001); to block septate junction formation, we  
405 expressed *cora*(RNAi) in the epidermis. We found that epidermal *PI4K*(RNAi) and *shi*<sup>DN</sup>  
406 expression severely attenuated PLC<sup>δ</sup>-PH-GFP accumulation at sheaths (Figure 5D,

407 Figure 5 – figure supplement 2). Since PLC<sup>δ</sup>-PH-GFP accumulation precedes dArf6  
408 accumulation at the onset of sheath formation, PIP2 accumulation and endocytic events  
409 may engage in feed-forward signaling to promote epidermal sheath formation. By  
410 contrast, epidermal *cora(RNAi)* had no effect on PLC<sup>δ</sup>-PH-GFP accumulation,  
411 suggesting that *cora* accumulation is a downstream event in sheath assembly.  
412 Consistent with this notion, both epidermal *PI4K(RNAi)* and *shi<sup>DN</sup>* expression blocked  
413 *cora* accumulation at sheaths (Figure 5D, Figure 5 – figure supplement 2), suggesting  
414 that *cora* recruitment to sheaths depends on PIP2 accumulation. PIP2 accumulation  
415 and *cora* accumulation therefore mark genetically separable steps in sheath assembly  
416 that we subsequently refer to as initiation and maturation, respectively (Figure 5E).

417

#### 418 **Epidermal sheaths regulate dendrite growth dynamics and structural plasticity**

419 What are the functions of epidermal sheaths that wrap somatosensory neurons? Prior  
420 studies suggested a role for epidermal ensheathment in restricting dendrite branching in  
421 *Drosophila* larvae (Jiang et al. 2014; Tenenbaum et al. 2017). We therefore assayed the  
422 requirement in dendrite growth of each of the sheath assembly components we  
423 identified in this study. We expressed *PI4K(RNAi)* to reduce epidermal PIP2 levels and  
424 monitored effects on c4da dendrite morphogenesis. Compared to controls, epidermis-  
425 specific expression of *PI4K(RNAi)* significantly increased the number and decreased the  
426 average length of terminal dendrites (Figure 6A-6B, 6G-6H). PLC<sup>δ</sup>-PH-GFP can function  
427 as a competitive inhibitor of PIP2 signaling (Raucher et al. 2000), and epidermal PLC<sup>δ</sup>-  
428 PH-GFP expression increased terminal dendrite branch number and decreased  
429 dendrite branch length in a dose-dependent manner (Figure 6 – figure supplement 1).

430 Similarly, blocking epidermal endocytosis via constitutive epidermal expression of *shl*<sup>DN</sup>  
431 or expressing temperature sensitive *shl*<sup>ts</sup> and using it to conditionally blocking epidermal  
432 endocytosis specifically in the time window during which dendrites are normally  
433 ensheathed led to severe terminal dendrite branching defects qualitatively similar to  
434 *PI4K(RNAi)* (Figure 6C-6D, 6G-6H). Finally, epidermal expression of *cora(RNAi)*  
435 induced growth of short terminal dendrites (Figure 6E, 6G-6H) as has been previously  
436 reported (Tenenbaum et al. 2017), as did epidermal expression of *shg(RNAi)* (Figure  
437 6F-6H). Thus, blocking the early or late events of epidermal sheath formation  
438 deregulates branching morphogenesis of *Drosophila* nociceptive c4da neurons.

439 To identify the cellular basis of these dendrite growth defects we monitored  
440 dendrite dynamics in control or sheath-defective larvae using time-lapse microscopy  
441 during the time window when sheaths normally form. Over an 18 h time-lapse beginning  
442 at 96 h AEL more than 80% of terminal dendrites persisted in control larvae, with the  
443 vast majority of these dendrites elongating (Figure 6I, 6L). By contrast, using epidermis-  
444 specific expression of *PI4K(RNAi)* or *cora(RNAi)* to block sheath initiation or maturation,  
445 respectively, led to significant alterations in branch dynamics (Figure 6J-6L). First, a  
446 larger fraction of terminal dendrites exhibited dynamic growth behavior. Second, the  
447 relative levels of growth and retraction were altered; whereas growth predominated in  
448 controls, growth and retraction occurred with comparable frequency in *PI4K(RNAi)* and  
449 *cora(RNAi)* larvae. Third, the average change in terminal dendrite length was reduced in  
450 *PI4K(RNAi)* and *cora(RNAi)* larvae (Figure 6M).

451 These results suggest that epidermal ensheathment alters dendrite growth  
452 properties by stabilizing existing terminal dendrites and promoting their elongation. To

453 further test this possibility, we simultaneously labeled epidermal sheaths (*Epi>PLC<sup>δ</sup>-PH-*  
454 *GFP*) and c4da dendrite arbors (*ppk-CD4-tdTomato*) and monitored terminal dendrite  
455 dynamics in ensheathed and unensheathed arbors. Whereas > 65% of terminal  
456 dendrites were present only transiently during a 12 h time lapse at the onset of  
457 ensheathment (72-84 h AEL), most terminal dendrites persisted during a 12 h time  
458 lapse after arbors were extensively ensheathed (108-120 h AEL) (Figure 6N). In this  
459 latter time window (108-120 h AEL) we compared the growth dynamics of ensheathed  
460 and unensheathed terminal dendrites and found that a significantly higher proportion of  
461 ensheathed terminal dendrites were growing or stable over the 12 h time-lapse (Figure  
462 6O). Altogether, our time-lapse imaging results strongly suggest that epidermal sheaths  
463 contribute to stabilization of somatosensory dendrites.

464         What is the relationship between epidermal ensheathment and dendrite  
465 branching? While dendrite branch points are occasionally ensheathed (Figure 1B) and  
466 new branches can be initiated from ensheathed dendrites (Han et al. 2012), we found  
467 that sheath formation is first initiated on long-lived dendrite shafts in proximal portions of  
468 the dendrite arbor rather than the more dynamic distal portions of the dendrite arbor  
469 (Figure 6 – figure supplement 2) and that dendrite branch points are less extensively  
470 ensheathed than unbranched portions of dendrite shafts. We therefore monitored the  
471 frequency of dendrite branching from ensheathed and unensheathed portions of  
472 dendrite arbors during a 12 h time-lapse. Consistent with prior observations (Han et al.  
473 2012), we did occasionally observe new branch initiation from ensheathed portions of  
474 dendrite arbors (Figure 6P), but the majority of new branch initiation occurred on  
475 unensheathed portions of dendrites. Intriguingly, a large proportion of new branches

476 were formed in the vicinity of epithelial intracellular junctions; whether this is simply a  
477 result of discontinuities in sheaths at intracellular junctions or reflects the function of  
478 non-autonomous branch-promoting activities associated with junctions remains to be  
479 determined.

480         Given that epidermal ensheathment constrains terminal dendrite dynamics in  
481 *Drosophila*, we next examined whether epidermal ensheathment limits structural  
482 plasticity of dendrite arbors, as has been suggested (Parrish et al. 2009; Jiang et al.  
483 2014). Embryonic ablation of c4da neurons leads to exuberant dendrite growth in  
484 spared neurons beyond their normal boundaries to fill vacated territory (Grueber et al.  
485 2003; Sugimura et al. 2003). This capacity of c4da neurons to expand their dendrite  
486 arbors beyond normal boundaries is progressively limited during development,  
487 concomitant with the increase in epidermal dendrite ensheathment (Parrish et al. 2009;  
488 Jiang et al. 2014). Following ablation of a single c4da neuron at 72 h AEL, the spared  
489 neighboring neurons extend their dendrite arbors to cover 13% of the vacated territory,  
490 on average (Figure 6Q, 6T). If epithelial ensheathment limits the structural plasticity of  
491 c4da dendrite arbors, we reasoned that blocking epithelial sheath formation should  
492 potentiate the invasive growth activity of c4da neurons following ablation of their  
493 neighbors. Indeed, epidermis-specific *PI4K(RNAi)* or *cora(RNAi)* resulted in a significant  
494 potentiation of dendrite invasion (Figure 6R-6T). In addition to regulating the growth  
495 dynamics and elongation of individual terminal dendrites, these results suggest that  
496 epidermal ensheathment contributes to the fidelity of receptive field coverage by  
497 coupling dendrite and epidermis expansion.

498

499 **Epidermal sheaths regulate nociception in *Drosophila* larvae**

500 What role, if any, does epidermal ensheathment play in somatosensation? Having found  
501 that nociceptive c4da neurons and proprioceptive c1da neurons were the most  
502 extensively and least extensively ensheathed da neurons, respectively, we investigated  
503 whether blocking sheath formation affected sensory-evoked behavioral responses  
504 regulated by these neurons. Harsh touch activates c4da nociceptive neurons to elicit  
505 stereotyped nocifensive rolling responses (Zhong et al., 2010), so we monitored touch-  
506 evoked rolling responses and rates of larval locomotion in control or sheath-defective  
507 larvae as a measure for sheath influence on c4da neuron function. Stimulation with a  
508 78nM von Frey filament induced nociceptive rolling behavior in >60% of control larvae,  
509 whereas c4da-specific expression of the inward rectifying potassium channel Kir2.1  
510 strongly attenuated this rolling response (Figure 7A). Compared to controls, epidermal  
511 expression of either *PI4KIIIa(RNAi)* to block PIP2 accumulation or *PIS(RNAi)* to reduce  
512 phosphoinositol biosynthesis, or feeding larvae the cell permeant polyphosphoinositide-  
513 binding peptide PBP10 to antagonize PIP2 signaling during the time window of sheath  
514 formation significantly attenuated mechanonociceptive behavior (Figure 7A). Epidermal  
515 expression of *shi<sup>DN</sup>* to block epidermal endocytosis and *cora(RNAi)* to block sheath  
516 maturation similarly attenuated mechanonociception. We additionally found that  
517 previously reported treatments that block ensheathment including overexpressing  $\alpha$ -  
518 and  $\beta$ -integrin in c4da neurons to tether dendrites to the ECM (Han et al. 2012; Jiang et  
519 al. 2014) and mutation of the miRNA *bantam* (Jiang et al. 2014) displayed reduced  
520 rolling rates in response to von Frey stimuli.

521 Finally, we assayed for effects of ensheathment on larval locomotion. Input from  
522 proprioceptive c1da neurons is required for coordinated larval locomotion, and  
523 perturbing c1da neuron function severely attenuates larval crawling speed (Song et al.  
524 2007). Treatments that reduced epidermal sheath formation did not reduce larval stride  
525 length or crawling speed as would be expected for disruption of proprioceptor function,  
526 but instead led to increased larval crawling speed (Fig. 7B and data not shown). This  
527 increased crawling speed was largely the result of reduced turning frequency and a  
528 concomitant increase in forward-directed locomotion (Fig. 7C), similar to defects in  
529 crawling trajectory induced by perturbing c4da function (Ainsley et al. 2003; Gorczyca et  
530 al. 2014), further suggesting that ensheathment modulates c4da function. Thus,  
531 epidermal ensheathment potentiates nociceptive mechanosensory responses and is  
532 apparently dispensable for proprioceptor function, consistent with our observation that  
533 nociceptive c4da but not proprioceptive c1da neurons exhibit extensive epidermal  
534 ensheathment.

535

## 536 Discussion

537 A neuron's function is profoundly influenced by its interaction with cells around it. In the  
538 skin, specialized interactions with epidermal cells influence the function of a variety of  
539 different sensory neurons. However, despite the fact that keratinocytes are the most  
540 abundant cell type in the epidermis, roles for keratinocyte-sensory neuron interactions in  
541 somatosensation are still not well characterized. Here, we have identified a conserved  
542 morphogenetic program for ensheathment of peripheral somatosensory neurites by  
543 keratinocytes. In both *Drosophila* and zebrafish, sensory neurite-derived signals induce



544 keratinocytes or keratinocyte-like epidermal cells to ensheath somatosensory neurons  
545 in a neuron type-specific manner. These neurite-derived signals induce local formation  
546 of epidermal PIP2-enriched membrane microdomains that are essential for  
547 ensheathment, local assembly of F-actin, and recruitment of junctional proteins that  
548 likely seal the sheaths. (Similarities and differences (timescale) in fly and fish  
549 ensheathment)

550

### 551 **What triggers the formation of epidermal sheaths?**

552 While the signals are not yet known, our studies define key features of the signaling  
553 system that drives sheath formation. First, epidermal sheath formation likely relies on  
554 short-range, contact-mediated signals involving neuron-expressed ligands and  
555 epidermal receptors, as sheaths form exclusively at sites occupied by peripheral  
556 sensory neurites. Such a signaling system bears similarity to the *C. elegans* epidermal  
557 SAX-7/L1CAM and MNR-1/Menorin co-ligand complex that interacts with neuronal  
558 DMA-1 to regulate patterning of PVD dendrites (Dong et al. 2013; Salzberg et al. 2013).  
559 However, whereas PVD dendrites are positioned according to a hypodermal grid of  
560 SAX-7/L1CAM expression (Liang et al. 2015), the location of epidermal sheaths is  
561 dependent on neuron-derived signals rather than an epidermal pre-pattern. Second,  
562 different types of neurons have different capacities to induce epidermal sheath  
563 formation; in zebrafish, only somatosensory neurons are capable of inducing sheath  
564 formation on the apical membranes of basal keratinocytes, and different classes of  
565 somatosensory neurons are ensheathed to different degrees in *Drosophila* and  
566 zebrafish. The epidermal sheaths that wrap different types of somatosensory neurons

567 are structurally similar, thus it seems likely that different levels of the sheath-inducing  
568 ligand determine the extent of ensheathment much as Nrg1 levels can drive the extent  
569 of Schwann cell ensheathment (Michailov et al. 2004). Based on the conservation in the  
570 molecular machinery of sheath formation, such a ligand and its epidermal receptor are  
571 likely conserved in fish and flies. Third, sheath formation is temporally regulated. In both  
572 *Drosophila* and zebrafish, flies, somatosensory neurites innervate the epidermis more  
573 than a day prior to sheath formation (Parrish et al. 2009; O'Brien et al. 2012). This may  
574 reflect a lack of competence by epithelial cells to ensheath somatosensory neurites as  
575 accelerating developmental progression in the *Drosophila* epidermis leads to precocious  
576 dendrite ensheathment (Jiang et al. 2014). Finally, our laser severing experiments  
577 suggest that peripheral neurites are required to maintain epidermal sheaths. Whether  
578 maintenance of sheaths is dependent on a dedicated maintenance signal or simply  
579 reflects the absence of morphogenetic signals that would remodel sheaths, for example  
580 the exposure by neurites to phosphatidylserine or other engulfment-promoting signals,  
581 remains to be determined.

582       The earliest epidermal morphogenetic event we identified downstream of neurite-  
583 derived ensheathment signals is the appearance of PIP2-enriched membrane  
584 microdomains. How might neurite-derived signals trigger local accumulation of  
585 epidermal PIP2? Two prominent mechanisms exist to form localized pools of PIP2 in  
586 the plasma membrane (Kwiatkowska 2010), and each can be triggered by cell-cell  
587 contacts. First, PIP2 can be locally clustered via electrostatic interactions with polybasic  
588 proteins such as myristoylated alanine rich C-kinase substrate (MARCKS) (Glaser et al.  
589 1996; Gambhir et al. 2004; McLaughlin and Murray 2005), which additionally binds and

590 cross-links filamentous actin (Myat et al. 1997). Protocadherins regulate cortical  
591 dendrite morphogenesis in part by maintaining a membrane-associated pool of active  
592 MARCKS (Garrett et al. 2012), thus Protocadherin-based adhesion provides one  
593 potential mechanism for localizing MARCKS and hence PIP2 in epidermal cells.  
594 Neuronal signals could likewise trigger PIP2 localization via engagement of  
595 transmembrane receptors with intracellular domains that electrostatically interact with  
596 and cluster PIP2 (McLaughlin and Murray 2005) or via membrane recruitment of other  
597 polybasic proteins such as Adducins or GAP43 (Kwiatkowska 2010). Second, PIP2 can  
598 be locally synthesized, most commonly via phosphorylation of phosphatidylinositol 4-  
599 phosphate, and type I phosphatidylinositol 4-phosphate 5 kinase (PIP5KI) can associate  
600 with N-cadherin to locally produce PIP2 at sites of N-cadherin adhesion (El Sayegh et  
601 al. 2007). PIP5KI associates with the exocyst via direct interaction with Exo70 to  
602 promote membrane targeting of E-cadherin (Xiong et al. 2012), thus cadherin-based  
603 adhesion can be both a cause and effect of localized PIP2 synthesis. While we have not  
604 found evidence for an epidermal PIP2 pre-pattern that determines sites of  
605 ensheathment, PIP5K additionally localizes to focal adhesions to provide a local source  
606 of PIP2 (Ling et al. 2002). Thus, it will be intriguing to determine whether Integrin-based  
607 adhesions contribute to epidermal sheath formation by generating local asymmetries in  
608 PIP2 levels that get amplified by neuron-derived signals.

609 Plasma membrane enrichment of epidermal PIP2 serves as a critical control point  
610 for a variety of cellular processes (Sun et al. 2013). Among these, we note remarkable  
611 similarities between epidermal sheath formation and the early events of phagocytosis.  
612 First, sheath formation and the early stages of phagocytosis appear to involve similar

613 cellular rearrangements, with ensheathing cells and engulfing cells wrapping their  
614 targets with membrane protrusions. Second sheath formation and phagocytosis share a  
615 common set of molecular mediators as PIP2 accumulates in nascent epidermal sheaths  
616 and in the phagocytic cup of engulfing cells (Botelho et al. 2000), as does a network of  
617 F-actin (Scott et al. 2005). Third, many types of ensheathing cells additionally exhibit  
618 phagocytic activity, including *Drosophila* and zebrafish keratinocytes (Han et al. 2014;  
619 Rasmussen et al. 2015), *Drosophila* ensheathing glia (Doherty et al. 2009), and  
620 astrocytes (Chung et al. 2013). However, whereas PIP2 levels persist at sheaths, PIP2  
621 disappears from the phagosomal membrane during the late stages of phagocytosis  
622 (Botelho et al. 2000), leading to disassembly of the associated actin network (Scott et  
623 al. 2005). Similarly, transient accumulation of PIP2 is a feature of endocytosis, cell  
624 migration, and other PIP2 regulated morphogenetic events. Thus, it seems plausible  
625 that reducing PIP2 levels leads to phagocytic engulfment of neurites, providing a  
626 mechanism for rapid conversion of the epidermal ensheathment channels to engulfment  
627 channels; such a finding could account for the finding that *Drosophila* epidermal cells  
628 actively participate in dendrite fragmentation (Han et al. 2014).

629

### 630 **Functional roles for epidermal neurite ensheathment**

631 Consistent with prior reports, we found that epidermal ensheathment limits dendrite  
632 branching of *Drosophila* nociceptive c4da neurons (Jiang et al. 2014; Tenenbaum et al.  
633 2017). We also found that the extent of ensheathment is inversely related to peripheral  
634 axon branch number in zebrafish somatosensory neurons, suggesting that epidermal  
635 ensheathment could similarly regulate neurite branching in vertebrates. This epidermal

636 growth control of peripheral sensory arbors appears to involve two related mechanisms.  
637 First, epidermal ensheathment limits dendrite branching; dendrite branching events  
638 rarely occur on ensheathed dendrites, and blocking epidermal ensheathment  
639 potentiates dendrite branching. This dendrite branching control may reflect a masking of  
640 dendrite arbors from substrate-derived signals that promote branching or a steric  
641 hindrance of branching. Second, epidermal ensheathment stabilizes existing neurites;  
642 blocking epidermal ensheathment potentiates dynamic growth behavior and structural  
643 plasticity in *Drosophila* sensory neurons. Determining whether ensheathment similarly  
644 regulates structural plasticity in zebrafish will require development of more and better  
645 tools for effectively blocking sheath formation in zebrafish. However, given that the  
646 timing of epidermal sheath formation correlates with the developmental restriction in  
647 structural plasticity in both *Drosophila* and zebrafish (O'Brien et al. 2012; Jiang et al.  
648 2014), developmental control of ensheathment appears to be a likely mechanism to  
649 stabilize receptive fields of somatosensory neurons.

650 Different types of somatosensory neurons appear to be ensheathed to different  
651 degrees. What would be the purpose of such an arrangement? Many different types of  
652 somatosensory neurons innervate overlapping territories, and one recent study  
653 suggests that selective ensheathment of particular sensory neuron types facilitates  
654 coexistence of different types of sensory neurons in a given territory (Tenenbaum et al.  
655 2017). Differential levels of ensheathment may additionally allow for differential coupling  
656 of somatosensory neurons to epidermal growth-promoting signals. Likewise, differential  
657 ensheathment of somatosensory neuron types may allow different levels of functional  
658 coupling of sensory neurons and epidermis. Our finding that nociceptive c4da neurons

659 are the most extensively ensheathed *Drosophila* somatosensory neurons, and that  
660 ensheathment regulates nociceptive sensitivity, suggests that epidermal ensheathment  
661 may play a particularly important role in tuning responses to noxious stimuli. Intriguingly,  
662 mutations that block ensheathment impair the function of a subset of *C. elegans*  
663 mechanosensory neurons (X. Chen and Chalfie 2014); whether these mechanosensory  
664 impairments are a consequence of ensheathment defects or other effects of the  
665 mutations remains to be determined.

666       How might epidermal sheaths influence nociceptive sensitivity? First, epidermal  
667 sheaths may potentiate the functional coupling of epidermal cells to somatosensory  
668 neurons. Recent studies suggest that sensory-evoked responses of keratinocytes may  
669 modulate sensory neuron function (Koizumi et al. 2004; Baumbauer et al. 2015; Pang et  
670 al. 2015; Moehring et al. 2018), and epidermal sheaths could provide sites for vesicle  
671 release from keratinocytes or direct electrical coupling between keratinocytes and  
672 somatosensory neurons. Merkel cells provide a precedent for the former possibility  
673 (Maksimovic, Baba, and Lumpkin 2013), but whether keratinocytes possess presynaptic  
674 release machinery and which neurotransmitters they express remain to be determined.  
675 Alternatively, epidermal ensheathment could potentiate nociceptor sensitivity by  
676 increasing proximity to stimulus source, by clustering sensory channels, or by some  
677 other means. Regardless of the mechanism, our findings that epidermal ensheathment  
678 modulates nociceptive sensitivity suggest that defects in epidermal ensheathment could  
679 contribute to sensory deficits in human disease. Intriguingly, some forms of peripheral  
680 neuropathy exhibit loss of unmyelinated intraepidermal nerves (Weis et al. 2011;

681 Üçeyler et al. 2013); whether defects in epithelial ensheathment play a role in these  
682 sensory neuropathies remains to be determined.

683

## 684 **Materials and Methods**

### 685 **Animal Care**

686 Flies were maintained on standard cornmeal-molasses-agar media and reared at 25° C  
687 under 12 h alternating light-dark cycles. The following alleles were used in this study:

688 *w<sup>1118</sup>* (BDSC:); *ppk-CD4-tdTomato* (BDSC:35844, BDSC:35845); *ppk-mCD8-GFP* (Han,

689 Jan, and Jan 2011); *UAS-PLCγ-PH-GFP* (BDSC:39693); *UAS-PLCγ-PH<sup>S39R</sup>-GFP*

690 (BDSC:39694); *UAS-PLCD1-PH-Cerulean* (BDSC:31421); *UAS-2xOsh2PH-GFP*

691 (BDSC:57353); *UAS-GMA-GFP* (BDSC:31176); *UAS-Rho1-GFP* (BDSC:9393); *UAS-*

692 *shg-GFP* (BDSC:58445); *UAS-Arf51-GFP* (BDSC:65867); *UAS-CD4-tdGFP*

693 (BDSC:35836); *lexAOP-CD4-tdTomato* (BDSC:77138); *UAS-PIS(RNAi)* (BDSC:29383);

694 *UAS-PI4KII(RNAi)* (BDSC:38242); *UAS-cora(RNAi)* (BDSC:51845); *UAS-shg(RNAi)*

695 (BDSC:32904); *UAS-shi<sup>fs</sup>* (BDSC:44222); *UAS-shi<sup>DN</sup>* (BDSC:5811); *UAS-rpr*

696 (BDSC:5824); *UAS-mys*, *UAS-mew* (Jiang et al. 2014); *UAS-Kir2.1-GFP* (BDSC:6596);

697 *A58-Gal4* (BDSC:); *ppk-Gal4* (Grueber et al. 2003); *21-7-Gal4* (Song et al. 2007);

698 *Cha<sup>7.4kb</sup>-Gal80* (Sakai et al. 2009); *elav-LexA* (BDSC:23872); *nompC-LexA*

699 (BDSC:52241); *bantam<sup>Δ1</sup>* (Brennecke et al. 2003); *Arf51<sup>GFP</sup>* (BDSC:60586); *shg<sup>GFP</sup>*

700 (BDSC:60584). See Table S1 for a complete list of reporters used for the expression

701 screen detailed in Figure 1 and Figure 1 – figure supplement 1. Experimental genotypes

702 are listed in Table S2.

703

704 *Zebrafish*

705 Zebrafish (*Danio rerio*) were grown at 28.5°C on a 14 h/10 h light/dark cycle. The  
706 following previously described transgenic strains were used: *TgBAC(tp63:GAL4FF)<sup>la213</sup>*,  
707 *Tg(isl1[ss]: LEXA-VP16,LEXAop:tdTomato)<sup>la215</sup>* (Rasmussen et al. 2015), *Tg(isl1:GAL4-*  
708 *VP16,UAS:RFP)<sup>zf234</sup>* (O'Brien, Martin, et al. 2009), *Gt(ctnna-citrine)<sup>ct3a</sup>* (Trinh et al.  
709 2011), *Gt(jupa-citrine)<sup>ct520a</sup>* (Trinh et al. 2011), *Tg(UAS:lifeact-GFP)<sup>mu271</sup>* (Helker et al.  
710 2013) and *Tg(UAS:GFP-CAAX)<sup>pd1025</sup>* (Ellis, Bagwell, and Bagnat 2013). All  
711 experimental procedures were approved by the Chancellor's Animal Research Care  
712 Committee at UCLA.

713

714 *BAC modification*

715 To generate BAC reporters for *dsc2l* and *dspa*, the corresponding stop codons in BACs  
716 CH73-316A13 and CH211-120J4, respectively, were replaced by a GFP-KanR cassette  
717 as previously described (Suster et al. 2011).

718

719 *UAS:GFP-PH-PLC zebrafish transgenic ilne construction*

720 To generate pME-EGFP-PH-PLC, the PH domain of rat PLC1  $\delta$  1 was PCR amplified  
721 from pAA173 (Kachur, Audhya, and Pilgrim 2008) and cloned into pME-EGFP (Kwan et  
722 al. 2007) using the restriction enzymes XhoI and BglIII. The pDEST-4xUASnr-EGFP-PH-  
723 PLC-pA plasmid was created by Gateway cloning of p5E-4xUASnr (Akitake et al. 2011),  
724 pME-EGFP-PH-PLC and p3E-pA. To create a stable line, one cell stage embryos were



725 injected with pDEST-4xUASnr-EGFP-PH-PLC-pA and *tol2* mRNA, raised to adulthood  
726 and screened for transgene transmission to the F1 generation.

727

### 728 *Zebrafish Cdh1-tdtomato<sup>xt18</sup> gene trap*

729 E-cadherin knock-in fish lines were made by the approach developed by Auer et al.  
730 (Auer et al. 2014). Zebrafish were injected at the 1-cell stage with Cas9 mRNA and two  
731 gRNAs – one targeting E-cadherin 3 amino acids upstream of the stop codon, and one  
732 targeting GFP in a coinjected plasmid (pUC19 GFPgRNA-Tomato-Ub polyA) containing  
733 the tdTomato ORF. This causes the insertion of the entire pUC19 GFPgRNA-Tomato-  
734 Ub polyA sequence, starting at the GFP gRNA site directly upstream of the Tomato  
735 ORF. ~1 nl of an injection mix consisted of 50 ng/ $\mu$ l of each gRNAs, pUC19 GFPgRNA-  
736 Tomato-Ub at 12 ng/ $\mu$ l, and Cas9 mRNA at 150 ng/ $\mu$ l. Animals with fluorescence at 2  
737 dpf were raised to adulthood and outcrossed to identify founder animals. An insertion  
738 allele was identified in which the two penultimate residues, glycine and a glutamate,  
739 were deleted during NHEJ insertion, but the final amino acid, aspartate, was rescued  
740 with sequence from the insertion. The c-terminus of E-cadherin thus changed from  
741 GGGED to GGD, with the tdTomato sequence fused directly downstream.

742

### 743 *Zebrafish transient transgenesis*

744 To label lateral line axons, one to four-cell stage zebrafish embryos were injected with  
745 25 pg of a *neurod:mTangerine* plasmid (gift from Alex Nechiporuk, Oregon Health &

746 Science University, Portland, OR). 200 pg of BAC reporters for *dsc2l* and *dspa* were  
747 injected at the one to four-cell stage.

748

#### 749 *Morpholino injection*

750 To block somatosensory neuron development, one cell stage embryos were injected  
751 with 1 nl of injection mixture containing an antisense morpholino oligonucleotide  
752 targeting *neurog1* (5'-ACGATCTCCATTGTTGATAACCTGG-3') at a concentration of  
753 0.7 mM (Andermann, Ungos, and Raible 2002; Cornell and Eisen 2002). Loss of  
754 response to touch was monitored to confirm efficacy of the treatment. As a control,  
755 embryos were injected with 1 nl of an antisense morpholino that targets an intron of the  
756 human beta-globin gene (5'-CCTCTTACCTCAGTTACAATTTATA-3') at a concentration  
757 of 0.7 mM. Antisense morpholino oligonucleotides were synthesized by GeneTools  
758 (Philomath, OR).

759

#### 760 *AG1478 treatment*

761 The ErbB receptor antagonist AG1478 was used to perturb repositioning of the pLLn  
762 below the epidermis (Raphael, Perlin, and Talbot 2010). Embryos were bathed in  
763 embryonic medium containing either 4  $\mu$  M AG1478/1% DMSO or 1% DMSO as a  
764 control.

765

#### 766 **Microscopy**

767 *Imaging.* *Drosophila* larvae were mounted in 90% glycerol under No. 1 coverslips and  
768 imaged using a Leica SP5 microscope with a 40x 1.2 NA oil immersion lens. For time-  
769 lapse analysis, larvae were imaged at the indicated time, recovered to yeasted agar  
770 plates with vented lids, aged at 25°C, and imaged again. Zebrafish embryos were  
771 mounted as described (O'Brien, Rieger, et al. 2009). Confocal imaging was performed  
772 on an LSM 510 or 800 confocal microscope (Carl Zeiss).

773

774 *Laser ablation.* Larvae were mounted in 90% glycerol under No. 1 coverslips, dendrites  
775 were imaged using a Leica SP8 2-photon microscope with a 20x 1.0 NA water  
776 immersion lens at 2x magnification under low (<20%) laser power. Cells were ablated or  
777 dendrites were severed by focusing high laser output (>80%) on the nucleus or a ~2  
778 micron dendrite segment (64x magnification ROI scan), respectively. Larvae were  
779 recovered to yeasted agar plates with vented lids, aged at 25°C, and processed for live  
780 imaging or immunostaining at the indicated time. Zebrafish axons were severed using a  
781 2-photon laser as previously described (O'Brien, Rieger, et al. 2009).

782

783 *Drosophila Immunostaining.* Third instar larvae were pinned on a sylgard plate, filleted  
784 along the ventral midline, and pinned open. After removing the intestines, fat bodies,  
785 imaginal discs and ventral nerve cord, fillets were fixed in PBS with 4% PFA for 15 min  
786 at room temperature, washed 4 times for 5 min each in PBS with 0.3% Tx-100 (PBS-Tx),  
787 blocked for 1 h in PBS-Tx + 5% normal donkey serum, and incubated in primary  
788 antibody overnight at 4° C. Samples were washed 4 times for 5 min each in PBS-Tx,

789 incubated in secondary antibody for 4 h at room temperature, washed 4 times for 5 min  
790 each in PBS-Tx, and stored in PBS prior to imaging. Antibody dilutions were as follows:  
791 rabbit anti-GFP (Fisher #A-11122, 1:500), mouse anti-coracle (DSHB, C566.9  
792 supernatant, 1:25), Rabbit anti-dsRed (Clonotech #632496, 1:200), HRP-Cy5 (Jackson  
793 Immunoresearch, 1:100), Goat anti-Mouse Alexa488 (Thermofisher A-11001, 1:200),  
794 Goat anti-rabbit Alexa 488 (Thermofisher A-11034, 1:200), Goat anti-rabbit Alexa 555  
795 (Thermofisher A-21428, 1:200).

796

### 797 *Drosophila expansion microscopy*

798 Immunostaining was as above with the following antibodies: Mouse anti-GFP, clone  
799 3E6 (Invitrogen #A11120, 1:100), Rabbit anti-dsRed (Clonotech #632496, 1:50), Goat  
800 anti-Mouse Alexa488 (Thermofisher A31561, 1:100), Donkey anti-Rabbit ATTO 565  
801 (Vaughan lab, 1:10). Following immunostaining, samples were mounted on lysine-  
802 coated #1.5 cover glass in polydimethylsiloxane wells and incubated in monomer  
803 solution (2 M NaCl, 8.625% Sodium Acrylate, 2.5% Acrylamide, 0.15% Bisacrylamide in  
804 PBS) for 1 h at 4° C prior to gelation. A stock of 4-hydroxy-2,2,6,6-tetramethylpiperidin-  
805 1-oxyl (4-hydroxy-TEMPO) at 1% (wt/wt) in water was added to the incubation solution  
806 and diluted to concentration of 0.01%. Concentrated stocks of  
807 tetramethylethylenediamine (TEMED) and ammonium persulfate (APS) at 10% (wt/wt)  
808 in water were added sequentially to the incubation solution and diluted to concentrations  
809 of 0.2% (wt/wt). The tissues were then incubated at 37 °C for 3-4 h. After gelation, the  
810 gels were cut and placed in a small 12-well chamber and 1mg/ml of Chitinase in PBS  
811 (pH 6.0) was used to digest the cuticles for ~4 d at 37 °C. Chitinase-treated samples

812 were incubated with 1000 units/ml collagenase solution (prepared with buffer 1x HBSS  
813 lacking calcium, magnesium, and phenol red) with 0.01 M CaCl<sub>2</sub> and 0.01 M MgCl<sub>2</sub>  
814 overnight in a 37 °C shaking incubation chamber. Samples were then rinsed with PBS  
815 twice for 5 min and digested in 8 units/ml proteinase K solution in digestion buffer (40  
816 mM Tris pH 8.0, 1 mM EDTA, 0.5% Triton, 0.8 M Guanidine HCl) for 1 h at 37 °C.  
817 Subsequently, samples were removed from the digestion solution and were allowed to  
818 expand overnight in a large excess of deionized water. After expansion, the expanded  
819 gel was trimmed to fit onto the coverglass, excess water was removed, and the gel was  
820 mounted on a lysine-coated cover glass for imaging. Confocal microscopy was  
821 performed on a Leica SP5 inverted confocal scanning microscope using a 63x 1.2 NA  
822 water lens.

823

#### 824 *Drosophila* SBF-SEM

825 Third instar larva were perforated with insect pins and cut open on ice in freshly made  
826 fixative (2.5% glutaraldehyde, 4% paraformaldehyde, 0.1 M sodium cacodylate).  
827 Samples were centrifuged 15000 x rpm in a microcentrifuge for 1 h and then incubated  
828 at 4° C overnight to achieve thorough fixation. Next, samples were washed 5 times for 5  
829 min each in 0.1 M sodium cacodylate and then post-fixed in osmium  
830 ferrocyanide for 1 h on ice. The tissues were then washed 5 times for 5 min each in  
831 ddH<sub>2</sub>O at room temperature and incubated in a 1% thiocarbohydrazide solution for 20  
832 min at room temperature. The samples were washed 5 times for 5 min each in ddH<sub>2</sub>O at  
833 room temperature and then incubated in 2% osmium tetroxide for 30 min at room  
834 temperature. Following another 5 washes for 5 min each in ddH<sub>2</sub>O at room temperature,

835 samples were stained en bloc in 1% uranyl acetate at 4° C overnight. The following day,  
836 tissues were washed 5 times for 5 min each in ddH<sub>2</sub>O at room temperature and stained  
837 en bloc in Walton's lead aspartate for 30 min at 60° C. The samples were then washed  
838 5 times for 5 min each in ddH<sub>2</sub>O and dehydrated in an ice cold ethanol series (30%,  
839 50%, 70%, and 95% EtOH), then transferred to room temperature for 5 min. This was  
840 followed by 2 changes of 100% EtOH and 2 changes of propylene oxide for 5 min each.  
841 The tissues were then infiltrated in a 1:1 mixture of propylene oxide : Durcupan resin,  
842 for 2 h at room temperature followed by overnight infiltration in fresh Durcupan. The  
843 following day, tissues were given a fresh change of Durcupan for 2 h at room  
844 temperature and then placed in flat embedding molds and polymerized in a 60° C oven  
845 for two days. The blocks were trimmed and imaged using a Zeiss Sigma scanning  
846 electron microscope with a Gatan 3-view system at 2.5-1.7 KV. Stacks (1000 sections)  
847 were collected with a 60 nm step size.

848

#### 849 *Zebrafish immunostaining*

850 Embryos were stained with a mouse anti-β-catenin antibody (610153; BD Biosciences)  
851 as previously described (Rasmussen et al. 2015).

852

#### 853 *Morphometric analysis*

854 All image analysis was performed using Fiji (Schindelin et al. 2012). The Simple Neurite  
855 Tracer plugin (Longair, Baker, and Armstrong 2011) was used to trace neurites,  
856 ensheathment channels and cell borders. Only basal cells for which the entire perimeter

857 of the cell was visible were traced. R (<https://www.r-project.org/>) was used to generate  
858 plots and perform statistical tests.

859

## 860 **Behavior assays**

861 *Harsh Touch*. Larvae were placed in a plastic petri dish with enough water, so larvae  
862 remained moist, but did not float in the dish. Von frey filaments made from fishing line  
863 and affixed to glass capillaries were applied to the dorsal side of the larvae between  
864 segments A3-A6 until the filament buckled, exhibiting a pre-determined force (~78mN).  
865 A positive response was scored if one complete nocifensive roll occurred within 10 sec  
866 of the mechanical stimulus.

867

868 *Larval locomotion*. Larvae were washed and placed on a 2% agar plate. To measure  
869 crawling velocity, 10 second videos of individual crawling larvae were recorded as  
870 uncompressed avi files using a Leica DFC310 FX camera on an AmScope FMA050  
871 mount. Files were converted to flymovieformat with any2ufmf and analyzed in Ctrax  
872 (Branson et al. 2009). To measure crawling trajectory, larval locomotion was analyzed  
873 using the frustrated total internal reflection-based imaging method FIM together with the  
874 FIMTrack software package (Risse et al. 2013).

875

## 876 **Experimental Design and Statistical Analysis**

877 Datasets were tested for normality using Shapiro-Wilks goodness of fit tests. Details on  
878 statistical tests are provided in figure legends.

879

## 880 **Acknowledgements**

881 This work was supported by grants from the National Institutes of Health To J.Z.P.  
882 (NINDS R01 NS076614), AS (NIAMS R01 AR064582), J.P.R. (NICHD K99 HD086271),  
883 and J.C.V (NIMH R01 MH115767), a JSPS long-term fellowship and startup funds from  
884 UW (J.Z.P); a WRF-Hall fellowship (K.P.L); a Jane Coffin Childs Memorial Fund  
885 fellowship. Fly Stocks were obtained from the Bloomington *Drosophila* Stock Center  
886 (NIH P40OD018537) and antibodies were obtained from the Developmental Studies  
887 Hybridoma bank, created by the NICHD of the NIH and maintained at The University of  
888 Iowa, were used in this study. We thank Julie Brill, Kazuo Emoto, and Peter Soba for  
889 helpful discussions, Le Trinh and Michel Bagnat for fish lines and Vasudha Chauhan for  
890 BAC cloning, and Stephen Basenfelder and Son Giang for excellent fish care.

891

## 892 **Author Contributions**

893 **Conception and design:** *Drosophila* studies, N.J. and J.Z.P; zebrafish studies, J.P.R.  
894 and A.S.

895 **Acquisition of *Drosophila* data:** SEM, N.J. and E.P.; ExM, N.J., H.J.K. and J.C.V.;  
896 marker screen, N.J. and J.Z.P.; ablation studies, N.J. and J.Z.P.; time-lapse imaging,  
897 J.Z.P.; behavior analysis, K.P.L. and J.Z.P.

898 **Acquisition of zebrafish data:** J.P.R., J.A.C., M.F.R. and A.S.

899 Generation of *E-cadherin-tdTomato*: M.R.C.

900 **Analysis and Interpretation of *Drosophila* data:** epidermis imaging data, N.J. and  
901 J.P; dendrite imaging and larval behavior data, J.P.

902 **Analysis and Interpretation of zebrafish data:** J.P.R., J.A.C., M.F.R. and A.S.



903 **Drafting the article:** J.Z.P., A.S., and J.P.R.

904

## 905 **Declaration of Interests**

906 The authors declare no competing interests.

907

## 908 **References**

909 Ainsley, Joshua A., Janette M. Pettus, Dmitry Bosenko, Clare E. Gerstein, Natalya Zinkevich,  
910 Michael G. Anderson, Christopher M. Adams, Michael J. Welsh, and Wayne A.  
911 Johnson. 2003. "Enhanced Locomotion Caused by Loss of the *Drosophila* DEG/ENaC  
912 Protein Pickpocket1." *Current Biology* 13 (17): 1557–63.

913

914 Akitake, Courtney M., Michelle Macurak, Marnie E. Halpern, and Mary G. Goll. 2011.  
915 "Transgenerational Analysis of Transcriptional Silencing in Zebrafish."  
916 *Developmental Biology* 352 (2): 191–201.  
917 <https://doi.org/10.1016/j.ydbio.2011.01.002>.

918

919 An, Xiuli, Xihui Zhang, Gargi Debnath, Anthony J. Baines, and Narla Mohandas. 2006.  
920 "Phosphatidylinositol-4,5-Biphosphate (PIP2) Differentially Regulates the  
921 Interaction of Human Erythrocyte Protein 4.1 (4.1R) with Membrane Proteins."  
922 *Biochemistry* 45 (18): 5725–32. <https://doi.org/10.1021/bi060015v>.

923

924 Andermann, Peter, Josette Ungos, and David W. Raible. 2002. "Neurogenin1 Defines  
925 Zebrafish Cranial Sensory Ganglia Precursors." *Developmental Biology* 251 (1): 45–  
926 58.

927

928 Auer, Thomas O., Karine Durore, Anne De Cian, Jean-Paul Concordet, and Filippo Del Bene.  
929 2014. "Highly Efficient CRISPR/Cas9-Mediated Knock-in in Zebrafish by Homology-  
930 Independent DNA Repair." *Genome Research* 24 (1): 142–53.  
931 <https://doi.org/10.1101/gr.161638.113>.

932

933 Baumbauer, Kyle M., Jennifer J. DeBerry, Peter C. Adelman, Richard H. Miller, Junichi  
934 Hachisuka, Kuan Hsien Lee, Sarah E. Ross, H. Richard Koerber, Brian M. Davis, and  
935 Kathryn M. Albers. 2015. "Keratinocytes Can Modulate and Directly Initiate  
936 Nociceptive Responses." *ELife* 4. <https://doi.org/10.7554/eLife.09674>.

937

938 Bidaux, Gabriel, Anne-sophie Borowiec, Dmitri Gordienko, Benjamin Beck, George G.  
939 Shapovalov, Loïc Lemonnier, Matthieu Flourakis, et al. 2015. "Epidermal TRPM8  
940 Channel Isoform Controls the Balance between Keratinocyte Proliferation and  
941 Differentiation in a Cold-Dependent Manner." *Proceedings of the National Academy*

- 942 *of Sciences of the United States of America* 112 (26): E3345-3354.  
943 <https://doi.org/10.1073/pnas.1423357112>.
- 944
- 945 Botelho, R. J., M. Teruel, R. Dierckman, R. Anderson, A. Wells, J. D. York, T. Meyer, and S.  
946 Grinstein. 2000. "Localized Biphasic Changes in Phosphatidylinositol-4,5-  
947 Bisphosphate at Sites of Phagocytosis." *The Journal of Cell Biology* 151 (7): 1353–68.  
948
- 949 Branson, Kristin, Alice Robie, John Bender, Pietro Perona, and Michael Dickinson. 2009.  
950 "High-Throughput Ethomics in Large Groups of *Drosophila*." *Nature Methods* 6 (6):  
951 451–57. <https://doi.org/10.1038/nmeth.1328>.
- 952
- 953 Brennecke, Julius, David R Hipfner, Alexander Stark, Robert B Russell, and Stephen M  
954 Cohen. 2003. "Bantam Encodes a Developmentally Regulated MicroRNA That  
955 Controls Cell Proliferation and Regulates the Proapoptotic Gene *Hid* in *Drosophila*."  
956 *Cell* 113 (1): 25–36.  
957
- 958 Cauna, N. 1973. "The Free Penicillate Nerve Endings of the Human Hairy Skin." *Journal of*  
959 *Anatomy* 115 (Pt 2): 277–88.
- 960
- 961 Chalfie, M., and J. Sulston. 1981. "Developmental Genetics of the Mechanosensory Neurons  
962 of *Caenorhabditis Elegans*." *Developmental Biology* 82 (2): 358–70.  
963
- 964 Chen, Suzhen, Carlos Rio, Ru-Rong Ji, Pieter Dikkes, Richard E. Coggeshall, Clifford J. Woolf,  
965 and Gabriel Corfas. 2003. "Disruption of ErbB Receptor Signaling in Adult Non-  
966 Myelinating Schwann Cells Causes Progressive Sensory Loss." *Nature Neuroscience* 6  
967 (11): 1186–93. <https://doi.org/10.1038/nn1139>.
- 968
- 969 Chen, Xiaoyin, and Martin Chalfie. 2014. "Modulation of *C. Elegans* Touch Sensitivity Is  
970 Integrated at Multiple Levels." *The Journal of Neuroscience: The Official Journal of the*  
971 *Society for Neuroscience* 34 (19): 6522–36.  
972 <https://doi.org/10.1523/JNEUROSCI.0022-14.2014>.
- 973
- 974 Chen, Yong, Quan Fang, Zilong Wang, Jennifer Y. Zhang, Amanda S. MacLeod, Russell P. Hall,  
975 and Wolfgang B. Liedtke. 2016. "Transient Receptor Potential Vanilloid 4 Ion  
976 Channel Functions as a Pruriceptor in Epidermal Keratinocytes to Evoke  
977 Histaminergic Itch." *The Journal of Biological Chemistry* 291 (19): 10252–62.  
978 <https://doi.org/10.1074/jbc.M116.716464>.
- 979
- 980 Chung, Won-Suk, Laura E. Clarke, Gordon X. Wang, Benjamin K. Stafford, Alexander Sher,  
981 Chandrani Chakraborty, Julia Joung, et al. 2013. "Astrocytes Mediate Synapse  
982 Elimination through MEGF10 and MERTK Pathways." *Nature* 504 (7480): 394–400.  
983 <https://doi.org/10.1038/nature12776>.
- 984
- 985 Cornell, Robert A., and Judith S. Eisen. 2002. "Delta/Notch Signaling Promotes Formation of  
986 Zebrafish Neural Crest by Repressing Neurogenin 1 Function." *Development* 129  
987 (11): 2639–48.

- 988  
989 Damke, H., D. D. Binns, H. Ueda, S. L. Schmid, and T. Baba. 2001. "Dynamin GTPase Domain  
990 Mutants Block Endocytic Vesicle Formation at Morphologically Distinct Stages."  
991 *Molecular Biology of the Cell* 12 (9): 2578–89.  
992
- 993 De Craene, Johan-Owen, Dimitri L. Bertazzi, Séverine Bär, and Sylvie Friant. 2017.  
994 "Phosphoinositides, Major Actors in Membrane Trafficking and Lipid Signaling  
995 Pathways." *International Journal of Molecular Sciences* 18 (3).  
996 <https://doi.org/10.3390/ijms18030634>.  
997
- 998 Denk, Winfried, and Heinz Horstmann. 2004. "Serial Block-Face Scanning Electron  
999 Microscopy to Reconstruct Three-Dimensional Tissue Nanostructure." *PLoS Biology*  
1000 2 (11): e329. <https://doi.org/10.1371/journal.pbio.0020329>.  
1001
- 1002 Doherty, Johnna, Mary A. Logan, Ozge E. Tasdemir, and Marc R. Freeman. 2009.  
1003 "Ensheathing Glia Function as Phagocytes in the Adult Drosophila Brain." *The*  
1004 *Journal of Neuroscience : The Official Journal of the Society for Neuroscience* 29 (15):  
1005 4768–81. <https://doi.org/10.1523/JNEUROSCI.5951-08.2009>.  
1006
- 1007 Dong, Xintong, Oliver W. Liu, Audrey S. Howell, and Kang Shen. 2013. "An Extracellular  
1008 Adhesion Molecule Complex Patterns Dendritic Branching and Morphogenesis." *Cell*  
1009 155 (2): 296–307. <https://doi.org/10.1016/j.cell.2013.08.059>.  
1010
- 1011 D'Souza-Schorey, Crislyn, and Philippe Chavrier. 2006. "ARF Proteins: Roles in Membrane  
1012 Traffic and Beyond." *Nature Reviews. Molecular Cell Biology* 7 (5): 347–58.  
1013 <https://doi.org/10.1038/nrm1910>.  
1014
- 1015 El Sayegh, T. Y., P. D. Arora, K. Ling, C. Laschinger, P. A. Janmey, R. A. Anderson, and C. A.  
1016 McCulloch. 2007. "Phosphatidylinositol-4,5 Bisphosphate Produced by  
1017 PIP5K $\gamma$  Regulates Gelsolin, Actin Assembly, and Adhesion Strength of N-  
1018 Cadherin Junctions." *Molecular Biology of the Cell* 18 (8): 3026–38.  
1019 <https://doi.org/10.1091/mbc.e06-12-1159>.  
1020
- 1021 Ellis, Kathryn, Jennifer Bagwell, and Michel Bagnat. 2013. "Notochord Vacuoles Are  
1022 Lysosome-Related Organelles That Function in Axis and Spine Morphogenesis." *The*  
1023 *Journal of Cell Biology* 200 (5): 667–79. <https://doi.org/10.1083/jcb.201212095>.  
1024
- 1025 Faroni, Alessandro, Luca Franco Castelnovo, Patrizia Procacci, Lucia Caffino, Fabio  
1026 Fumagalli, Simona Melfi, Giovanna Gambarotta, Bernhard Bettler, Lawrence  
1027 Wrabetz, and Valerio Magnaghi. 2014. "Deletion of GABA-B Receptor in Schwann  
1028 Cells Regulates Remak Bundles and Small Nociceptive C-Fibers." *Glia* 62 (4): 548–65.  
1029 <https://doi.org/10.1002/glia.22625>.  
1030
- 1031 Gambhir, Alok, Gyöngyi Hangyás-Mihályné, Irina Zaitseva, David S. Cafiso, Jiyao Wang,  
1032 Diana Murray, Srinivas N. Pentylala, Steven O. Smith, and Stuart McLaughlin. 2004.  
1033 "Electrostatic Sequestration of PIP2 on Phospholipid Membranes by Basic/Aromatic

- 1034 Regions of Proteins." *Biophysical Journal* 86 (4): 2188–2207.  
1035 [https://doi.org/10.1016/S0006-3495\(04\)74278-2](https://doi.org/10.1016/S0006-3495(04)74278-2).  
1036
- 1037 Garrett, Andrew M., Dietmar Schreiner, Mark A. Lobas, and Joshua A. Weiner. 2012. "γ-  
1038 Protocadherins Control Cortical Dendrite Arborization by Regulating the Activity of  
1039 a FAK/PKC/MARCKS Signaling Pathway." *Neuron* 74 (2): 269–76.  
1040 <https://doi.org/10.1016/j.neuron.2012.01.028>.  
1041
- 1042 Glaser, M., S. Wanaski, C. A. Buser, V. Boguslavsky, W. Rashidzada, A. Morris, M. Rebecchi, et  
1043 al. 1996. "Myristoylated Alanine-Rich C Kinase Substrate (MARCKS) Produces  
1044 Reversible Inhibition of Phospholipase C by Sequestering Phosphatidylinositol 4,5-  
1045 Bisphosphate in Lateral Domains." *The Journal of Biological Chemistry* 271 (42):  
1046 26187–93.  
1047
- 1048 Gorczyca, David A., Susan Younger, Shan Meltzer, Sung Eun Kim, Li Cheng, Wei Song, Hye  
1049 Young Lee, Lily Yeh Jan, and Yuh Nung Jan. 2014. "Identification of Ppk26, a  
1050 DEG/ENaC Channel Functioning with Ppk1 in a Mutually Dependent Manner to  
1051 Guide Locomotion Behavior in *Drosophila*." *Cell Reports* 9 (4): 1446–58.  
1052 <https://doi.org/10.1016/j.celrep.2014.10.034>.  
1053
- 1054 Grueber, Wesley B, Bing Ye, Adrian W Moore, Lily Y Jan, and Yuh Nung Jan. 2003.  
1055 "Dendrites of Distinct Classes of *Drosophila* Sensory Neurons Show Different  
1056 Capacities for Homotypic Repulsion." *Current Biology* 13 (8): 618–26.  
1057
- 1058 Han, Chun, Lily Yeh Jan, and Yuh-Nung Jan. 2011. "Enhancer-Driven Membrane Markers for  
1059 Analysis of Nonautonomous Mechanisms Reveal Neuron–Glia Interactions in  
1060 *Drosophila*." *Proceedings of the National Academy of Sciences* 108 (23): 9673–78.  
1061 <https://doi.org/10.1073/pnas.1106386108>.  
1062
- 1063 Han, Chun, Yuanquan Song, Hui Xiao, Denan Wang, Nathalie C. Franc, Lily Yeh Jan, and Yuh-  
1064 Nung Jan. 2014. "Epidermal Cells Are the Primary Phagocytes in the Fragmentation  
1065 and Clearance of Degenerating Dendrites in *Drosophila*." *Neuron* 81 (3): 544–60.  
1066 <https://doi.org/10.1016/j.neuron.2013.11.021>.  
1067
- 1068 Han, Chun, Denan Wang, Peter Soba, Sijun Zhu, Xinhua Lin, Lily Yeh Jan, and Yuh-Nung Jan.  
1069 2012. "Integrins Regulate Repulsion-Mediated Dendritic Patterning of *Drosophila*  
1070 Sensory Neurons by Restricting Dendrites in a 2D Space." *Neuron* 73 (1): 64–78.  
1071 <https://doi.org/10.1016/j.neuron.2011.10.036>.  
1072
- 1073 Hardie, Roger C., Che-Hsiung Liu, Alexander S. Randall, and Sukanya Sengupta. 2015. "In  
1074 Vivo Tracking of Phosphoinositides in *Drosophila* Photoreceptors." *Journal of Cell  
1075 Science* 128 (23): 4328–40. <https://doi.org/10.1242/jcs.180364>.  
1076
- 1077 Helker, Christian S. M., Annika Schuermann, Terhi Karpanen, Dagmar Zeuschner, Heinz-  
1078 Georg Belting, Markus Affolter, Stefan Schulte-Merker, and Wiebke Herzog. 2013.  
1079 "The Zebrafish Common Cardinal Veins Develop by a Novel Mechanism: Lumen

- 1080           Ensheathment." *Development* 140 (13): 2776–86.  
1081           <https://doi.org/10.1242/dev.091876>.  
1082
- 1083           Honda, A., M. Nogami, T. Yokozeiki, M. Yamazaki, H. Nakamura, H. Watanabe, K. Kawamoto,  
1084           et al. 1999. "Phosphatidylinositol 4-Phosphate 5-Kinase Alpha Is a Downstream  
1085           Effector of the Small G Protein ARF6 in Membrane Ruffle Formation." *Cell* 99 (5):  
1086           521–32.  
1087
- 1088           Jiang, Nan, Hyeon-Jin Kim, Tyler J. Chozinski, Jorge E. Azpurua, Benjamin A. Eaton, Joshua C.  
1089           Vaughan, and Jay Z. Parrish. 2018. "Super-Resolution Imaging of Drosophila Tissues  
1090           Using Expansion Microscopy." *Molecular Biology of the Cell*, April, mbcE17100583.  
1091           <https://doi.org/10.1091/mbc.E17-10-0583>.  
1092
- 1093           Jiang, Nan, Peter Soba, Edward Parker, Charles C. Kim, and Jay Z. Parrish. 2014. "The  
1094           MicroRNA Bantam Regulates a Developmental Transition in Epithelial Cells That  
1095           Restricts Sensory Dendrite Growth." *Development* 141 (13): 2657–68.  
1096           <https://doi.org/10.1242/dev.107573>.  
1097
- 1098           Kachur, Torah M., Anjon Audhya, and Dave B. Pilgrim. 2008. "UNC-45 Is Required for NMY-  
1099           2 Contractile Function in Early Embryonic Polarity Establishment and Germline  
1100           Cellularization in *C. Elegans*." *Developmental Biology* 314 (2): 287–99.  
1101           <https://doi.org/10.1016/j.ydbio.2007.11.028>.  
1102
- 1103           Kawakami, T., M. Ishihara, and M. Mihara. 2001. "Distribution Density of Intraepidermal  
1104           Nerve Fibers in Normal Human Skin." *The Journal of Dermatology* 28 (2): 63–70.  
1105
- 1106           Kim, Michelle E, Brikha R Shrestha, Richard Blazeski, Carol A Mason, and Wesley B Grueber.  
1107           2012. "Integrins Establish Dendrite-Substrate Relationships That Promote Dendritic  
1108           Self-Avoidance and Patterning in Drosophila Sensory Neurons." *Neuron* 73 (1): 79–  
1109           91. <https://doi.org/10.1016/j.neuron.2011.10.033>.  
1110
- 1111           Koizumi, Schuichi, Kayoko Fujishita, Kaori Inoue, Yukari Shigemoto-Mogami, Makoto  
1112           Tsuda, and Kazuhide Inoue. 2004. "Ca<sup>2+</sup> Waves in Keratinocytes Are Transmitted to  
1113           Sensory Neurons: The Involvement of Extracellular ATP and P2Y2 Receptor  
1114           Activation." *The Biochemical Journal* 380 (Pt 2): 329–38.  
1115           <https://doi.org/10.1042/BJ20031089>.  
1116
- 1117           Kwan, Kristen M., Esther Fujimoto, Clemens Grabher, Benjamin D. Mangum, Melissa E.  
1118           Hardy, Douglas S. Campbell, John M. Parant, H. Joseph Yost, John P. Kanki, and Chi-  
1119           Bin Chien. 2007. "The Tol2kit: A Multisite Gateway-Based Construction Kit for Tol2  
1120           Transposon Transgenesis Constructs." *Developmental Dynamics* 236 (11): 3088–99.  
1121           <https://doi.org/10.1002/dvdy.21343>.  
1122
- 1123           Kwiatkowska, Katarzyna. 2010. "One Lipid, Multiple Functions: How Various Pools of  
1124           PI(4,5)P(2) Are Created in the Plasma Membrane." *Cellular and Molecular Life  
1125           Sciences: CMLS* 67 (23): 3927–46. <https://doi.org/10.1007/s00018-010-0432-5>.

- 1126  
1127 Liang, Xing, Xintong Dong, Donald G. Moerman, Kang Shen, and Xiangming Wang. 2015.  
1128 "Sarcomeres Pattern Proprioceptive Sensory Dendritic Endings through UNC-  
1129 52/Perlecan in *C. Elegans*." *Developmental Cell* 33 (4): 388–400.  
1130 <https://doi.org/10.1016/j.devcel.2015.03.010>.  
1131  
1132 Ling, Kun, Renee L. Doughman, Ari J. Firestone, Matthew W. Bunce, and Richard A.  
1133 Anderson. 2002. "Type I Gamma Phosphatidylinositol Phosphate Kinase Targets and  
1134 Regulates Focal Adhesions." *Nature* 420 (6911): 89–93.  
1135 <https://doi.org/10.1038/nature01082>.  
1136  
1137 Liu, Yongdan, Xueli Fan, Yafen Wei, Zhongyuan Piao, and Xinmei Jiang. 2014.  
1138 "Intraepidermal Nerve Fiber Density of Healthy Human." *Neurological Research* 36  
1139 (10): 911–14. <https://doi.org/10.1179/1743132814Y.0000000377>.  
1140  
1141 Loewenstein, W. R., and R. Skalak. 1966. "Mechanical Transmission in a Pacinian Corpuscle.  
1142 An Analysis and a Theory." *The Journal of Physiology* 182 (2): 346–78.  
1143  
1144 Longair, Mark H., Dean A. Baker, and J. Douglas Armstrong. 2011. "Simple Neurite Tracer:  
1145 Open Source Software for Reconstruction, Visualization and Analysis of Neuronal  
1146 Processes." *Bioinformatics* 27 (17): 2453–54.  
1147 <https://doi.org/10.1093/bioinformatics/btr390>.  
1148  
1149 Maksimovic, Srdjan, Yoshichika Baba, and Ellen A. Lumpkin. 2013. "Neurotransmitters and  
1150 Synaptic Components in the Merkel Cell-Neurite Complex, a Gentle-Touch  
1151 Receptor." *Annals of the New York Academy of Sciences* 1279 (March): 13–21.  
1152 <https://doi.org/10.1111/nyas.12057>.  
1153  
1154 Maksimovic, Srdjan, Masashi Nakatani, Yoshichika Baba, Aislyn M. Nelson, Kara L. Marshall,  
1155 Scott A. Wellnitz, Pervez Firozi, et al. 2014. "Epidermal Merkel Cells Are  
1156 Mechanosensory Cells That Tune Mammalian Touch Receptors." *Nature* 509 (7502):  
1157 617–21. <https://doi.org/10.1038/nature13250>.  
1158  
1159 McLaughlin, Stuart, and Diana Murray. 2005. "Plasma Membrane Phosphoinositide  
1160 Organization by Protein Electrostatics." *Nature* 438 (7068): 605–11.  
1161 <https://doi.org/10.1038/nature04398>.  
1162  
1163 Michailov, Galin V., Michael W. Sereda, Bastian G. Brinkmann, Tobias M. Fischer, Bernhard  
1164 Haug, Carmen Birchmeier, Lorna Role, Cary Lai, Markus H. Schwab, and Klaus-Armin  
1165 Nave. 2004. "Axonal Neuregulin-1 Regulates Myelin Sheath Thickness." *Science* 304  
1166 (5671): 700–703. <https://doi.org/10.1126/science.1095862>.  
1167  
1168 Mihara, M., K. Hashimoto, K. Ueda, and M. Kumakiri. 1979. "The Specialized Junctions  
1169 between Merkel Cell and Neurite: An Electron Microscopic Study." *The Journal of*  
1170 *Investigative Dermatology* 73 (5): 325–34.  
1171

- 1172 Moehring, Francie, Ashley M. Cowie, Anthony D. Menzel, Andy D. Weyer, Michael  
1173 Grzybowski, Thiago Arzua, Aron M. Geurts, Oleg Palygin, and Cheryl L. Stucky. 2018.  
1174 “Keratinocytes Mediate Innocuous and Noxious Touch via ATP-P2X4 Signaling.”  
1175 *ELife* 7. <https://doi.org/10.7554/eLife.31684>.  
1176
- 1177 Munger, B. L. 1965. “The Intraepidermal Innervation of the Snout Skin of the Opossum. A  
1178 Light and Electron Microscope Study, with Observations on the Nature of Merkel’s  
1179 Tastzellen.” *The Journal of Cell Biology* 26 (1): 79–97.  
1180
- 1181 Myat, M. M., S. Anderson, L. A. Allen, and A. Aderem. 1997. “MARCKS Regulates Membrane  
1182 Ruffling and Cell Spreading.” *Current Biology* 7 (8): 611–14.  
1183
- 1184 Nguyen, Minh Q., Youmei Wu, Lauren S. Bonilla, Lars J. von Buchholtz, and Nicholas J. P.  
1185 Ryba. 2017. “Diversity amongst Trigeminal Neurons Revealed by High Throughput  
1186 Single Cell Sequencing.” *PloS One* 12 (9): e0185543.  
1187 <https://doi.org/10.1371/journal.pone.0185543>.  
1188
- 1189 O’Brien, Georgeann S., Seanna M. Martin, Christian Söllner, Gavin J. Wright, Catherina G.  
1190 Becker, Carlos Portera-Cailliau, and Alvaro Sagasti. 2009. “Developmentally  
1191 Regulated Impediments to Skin Reinnervation by Injured Peripheral Sensory Axon  
1192 Terminals.” *Current Biology* 19 (24): 2086–90.  
1193 <https://doi.org/10.1016/j.cub.2009.10.051>.  
1194
- 1195 O’Brien, Georgeann S., Sandra Rieger, Seanna M. Martin, Ann M. Cavanaugh, Carlos Portera-  
1196 Cailliau, and Alvaro Sagasti. 2009. “Two-Photon Axotomy and Time-Lapse Confocal  
1197 Imaging in Live Zebrafish Embryos.” *Journal of Visualized Experiments: JoVE*, no. 24.  
1198 <https://doi.org/10.3791/1129>.  
1199
- 1200 O’Brien, Georgeann S., Sandra Rieger, Fang Wang, Gromoslaw A. Smolen, Robert E.  
1201 Gonzalez, JoAnn Buchanan, and Alvaro Sagasti. 2012. “Coordinate Development of  
1202 Skin Cells and Cutaneous Sensory Axons in Zebrafish.” *The Journal of Comparative  
1203 Neurology* 520 (4): 816–31. <https://doi.org/10.1002/cne.22791>.  
1204
- 1205 Orita, Sumihisa, Kenneth Henry, Elisabetta Mantuano, Kazuyo Yamauchi, Alice De Corato,  
1206 Tetsuhiro Ishikawa, M. Laura Feltri, et al. 2013. “Schwann Cell LRP1 Regulates  
1207 Remak Bundle Ultrastructure and Axonal Interactions to Prevent Neuropathic Pain.”  
1208 *The Journal of Neuroscience: The Official Journal of the Society for Neuroscience* 33  
1209 (13): 5590–5602. <https://doi.org/10.1523/JNEUROSCI.3342-12.2013>.  
1210
- 1211 Owens, David M., and Ellen A. Lumpkin. 2014. “Diversification and Specialization of Touch  
1212 Receptors in Skin.” *Cold Spring Harbor Perspectives in Medicine* 4 (6).  
1213 <https://doi.org/10.1101/cshperspect.a013656>.  
1214
- 1215 Pang, Zixuan, Takashi Sakamoto, Vinod Tiwari, Yu-Shin Kim, Fei Yang, Xinzhong Dong, Ali  
1216 D. Güler, Yun Guan, and Michael J. Caterina. 2015. “Selective Keratinocyte

- 1217 Stimulation Is Sufficient to Evoke Nociception in Mice." *Pain* 156 (4): 656–65.  
1218 <https://doi.org/10.1097/j.pain.000000000000092>.  
1219
- 1220 Parrish, Jay Z, Peizhang Xu, Charles C Kim, Lily Yeh Jan, and Yuh Nung Jan. 2009. "The  
1221 MicroRNA Bantam Functions in Epithelial Cells to Regulate Scaling Growth of  
1222 Dendrite Arbors in Drosophila Sensory Neurons." *Neuron* 63 (6): 788–802.  
1223 <https://doi.org/10.1016/j.neuron.2009.08.006>.  
1224
- 1225 Peier, Andrea M., Alison J. Reeve, David A. Andersson, Aziz Moqrich, Taryn J. Earley, Anne C.  
1226 Hergarden, Gina M. Story, et al. 2002. "A Heat-Sensitive TRP Channel Expressed in  
1227 Keratinocytes." *Science* 296 (5575): 2046–49.  
1228 <https://doi.org/10.1126/science.1073140>.  
1229
- 1230 Raphael, Alya R., Julie R. Perlin, and William S. Talbot. 2010. "Schwann Cells Reposition a  
1231 Peripheral Nerve to Isolate It from Postembryonic Remodeling of Its Targets."  
1232 *Development* 137 (21): 3643–49. <https://doi.org/10.1242/dev.057521>.  
1233
- 1234 Rasmussen, Jeffrey P., Georgeann S. Sack, Seanna M. Martin, and Alvaro Sagasti. 2015.  
1235 "Vertebrate Epidermal Cells Are Broad-Specificity Phagocytes That Clear Sensory  
1236 Axon Debris." *The Journal of Neuroscience: The Official Journal of the Society for*  
1237 *Neuroscience* 35 (2): 559–70. <https://doi.org/10.1523/JNEUROSCI.3613-14.2015>.  
1238
- 1239 Rasmussen, Jeffrey P., Nhat-Thi Vo, and Alvaro Sagasti. 2018. "Fish Scales Dictate the  
1240 Pattern of Adult Skin Innervation and Vascularization." *Developmental Cell* 46 (3):  
1241 344–359.e4. <https://doi.org/10.1016/j.devcel.2018.06.019>.  
1242
- 1243 Raucher, D., T. Stauffer, W. Chen, K. Shen, S. Guo, J. D. York, M. P. Sheetz, and T. Meyer. 2000.  
1244 "Phosphatidylinositol 4,5-Bisphosphate Functions as a Second Messenger That  
1245 Regulates Cytoskeleton-Plasma Membrane Adhesion." *Cell* 100 (2): 221–28.  
1246
- 1247 Risse, Benjamin, Silke Thomas, Nils Otto, Tim Löpmeier, Dimitar Valkov, Xiaoyi Jiang, and  
1248 Christian Klämbt. 2013. "FIM, a Novel FTIR-Based Imaging Method for High  
1249 Throughput Locomotion Analysis." *PloS One* 8 (1): e53963.  
1250 <https://doi.org/10.1371/journal.pone.0053963>.  
1251
- 1252 Sakai, T., J. Kasuya, T. Kitamoto, and T. Aigaki. 2009. "The Drosophila TRPA Channel,  
1253 Painless, Regulates Sexual Receptivity in Virgin Females." *Genes, Brain, and Behavior*  
1254 8 (5): 546–57. <https://doi.org/10.1111/j.1601-183X.2009.00503.x>.  
1255
- 1256 Salzberg, Yehuda, Carlos A Díaz-Balzac, Nelson J Ramirez-Suarez, Matthew Attreed, Eillen  
1257 Teclé, Muriel Desbois, Zaven Kaprielian, and Hannes E Bülow. 2013. "Skin-Derived  
1258 Cues Control Arborization of Sensory Dendrites in Caenorhabditis Elegans." *Cell* 155  
1259 (2): 308–20. <https://doi.org/10.1016/j.cell.2013.08.058>.  
1260
- 1261 Schindelin, Johannes, Ignacio Arganda-Carreras, Erwin Frise, Verena Kaynig, Mark Longair,  
1262 Tobias Pietzsch, Stephan Preibisch, et al. 2012. "Fiji: An Open-Source Platform for



- 1263 Biological-Image Analysis." *Nature Methods* 9 (7): 676–82.  
1264 <https://doi.org/10.1038/nmeth.2019>.  
1265
- 1266 Scott, Cameron C., Wendy Dobson, Roberto J. Botelho, Natasha Coady-Osberg, Philippe  
1267 Chavrier, David A. Knecht, Colin Heath, Philip Stahl, and Sergio Grinstein. 2005.  
1268 "Phosphatidylinositol-4,5-Bisphosphate Hydrolysis Directs Actin Remodeling during  
1269 Phagocytosis." *The Journal of Cell Biology* 169 (1): 139–49.  
1270 <https://doi.org/10.1083/jcb.200412162>.  
1271
- 1272 Song, Wei, Maika Onishi, Lily Yeh Jan, and Yuh Nung Jan. 2007. "Peripheral Multidendritic  
1273 Sensory Neurons Are Necessary for Rhythmic Locomotion Behavior in *Drosophila*  
1274 Larvae." *Proceedings of the National Academy of Sciences of the United States of*  
1275 *America* 104 (12): 5199–5204. <https://doi.org/10.1073/pnas.0700895104>.  
1276
- 1277 Sugimura, Kaoru, Misato Yamamoto, Ryusuke Niwa, Daisuke Satoh, Satoshi Goto, Misako  
1278 Taniguchi, Shigeo Hayashi, and Tadashi Uemura. 2003. "Distinct Developmental  
1279 Modes and Lesion-Induced Reactions of Dendrites of Two Classes of *Drosophila*  
1280 Sensory Neurons." *The Journal of Neuroscience: The Official Journal of the Society for*  
1281 *Neuroscience* 23 (9): 3752–60.  
1282
- 1283 Sun, Yue, Narendra Thapa, Andrew C. Hedman, and Richard A. Anderson. 2013.  
1284 "Phosphatidylinositol 4,5-Bisphosphate: Targeted Production and Signaling."  
1285 *BioEssays: News and Reviews in Molecular, Cellular and Developmental Biology* 35  
1286 (6): 513–22. <https://doi.org/10.1002/bies.201200171>.  
1287
- 1288 Suster, Maximiliano L., Gembu Abe, Anders Schouw, and Koichi Kawakami. 2011.  
1289 "Transposon-Mediated BAC Transgenesis in Zebrafish." *Nature Protocols* 6 (12):  
1290 1998–2021. <https://doi.org/10.1038/nprot.2011.416>.  
1291
- 1292 Tenenbaum, Conrad M., Mala Misra, Rebecca A. Alizzi, and Elizabeth R. Gavis. 2017.  
1293 "Enclosure of Dendrites by Epidermal Cells Restricts Branching and Permits  
1294 Coordinated Development of Spatially Overlapping Sensory Neurons." *Cell Reports*  
1295 20 (13): 3043–56. <https://doi.org/10.1016/j.celrep.2017.09.001>.  
1296
- 1297 Trinh, Le A., Tatiana Hochgreb, Matthew Graham, David Wu, Frederique Ruf-Zamojski,  
1298 Chathurani S. Jayasena, Ankur Saxena, et al. 2011. "A Versatile Gene Trap to  
1299 Visualize and Interrogate the Function of the Vertebrate Proteome." *Genes &*  
1300 *Development* 25 (21): 2306–20. <https://doi.org/10.1101/gad.174037.111>.  
1301
- 1302 Üçeyler, Nurcan, Daniel Zeller, Ann-Kathrin Kahn, Susanne Kewenig, Sarah Kittel-  
1303 Schneider, Annina Schmid, Jordi Casanova-Molla, Karlheinz Reiners, and Claudia  
1304 Sommer. 2013. "Small Fibre Pathology in Patients with Fibromyalgia Syndrome."  
1305 *Brain: A Journal of Neurology* 136 (Pt 6): 1857–67.  
1306 <https://doi.org/10.1093/brain/awt053>.  
1307

- 1308 Usoskin, Dmitry, Alessandro Furlan, Saiful Islam, Hind Abdo, Peter Lönnerberg, Daohua  
1309 Lou, Jens Hjerling-Leffler, et al. 2015. "Unbiased Classification of Sensory Neuron  
1310 Types by Large-Scale Single-Cell RNA Sequencing." *Nature Neuroscience* 18 (1):  
1311 145–53. <https://doi.org/10.1038/nn.3881>.  
1312
- 1313 Várnai, P., and T. Balla. 1998. "Visualization of Phosphoinositides That Bind Pleckstrin  
1314 Homology Domains: Calcium- and Agonist-Induced Dynamic Changes and  
1315 Relationship to Myo-[3H]Inositol-Labeled Phosphoinositide Pools." *The Journal of*  
1316 *Cell Biology* 143 (2): 501–10.  
1317
- 1318 Verstreken, Patrik, Tomoko Ohyama, Claire Haueter, Ron L. P. Habets, Yong Q. Lin, Laura E.  
1319 Swan, Cindy V. Ly, Koen J. T. Venken, Pietro De Camilli, and Hugo J. Bellen. 2009.  
1320 "Tweek, an Evolutionarily Conserved Protein, Is Required for Synaptic Vesicle  
1321 Recycling." *Neuron* 63 (2): 203–15. <https://doi.org/10.1016/j.neuron.2009.06.017>.  
1322
- 1323 Weis, J., I. Katona, G. Müller-Newen, C. Sommer, G. Neula, C. Hendrich, A. C. Ludolph, and  
1324 A.-D. Sperfeld. 2011. "Small-Fiber Neuropathy in Patients with ALS." *Neurology* 76  
1325 (23): 2024–29. <https://doi.org/10.1212/WNL.0b013e31821e553a>.  
1326
- 1327 Whitear, M., and R. Moate. 1998. "Cellular Diversity in the Epidermis of *Raja Clavata*  
1328 (Chondrichthyes)." *Journal of Zoology* 246 (3): 275–85.  
1329 <https://doi.org/10.1111/j.1469-7998.1998.tb00158.x>.  
1330
- 1331 Woo, Seung-Hyun, Sanjeev Ranade, Andy D. Weyer, Adrienne E. Dubin, Yoshichika Baba,  
1332 Zhaozhu Qiu, Matt Petrus, et al. 2014. "Piezo2 Is Required for Merkel-Cell  
1333 Mechanotransduction." *Nature* 509 (7502): 622–26.  
1334 <https://doi.org/10.1038/nature13251>.  
1335
- 1336 Woolf, C. J., A. Allchorne, B. Safieh-Garabedian, and S. Poole. 1997. "Cytokines, Nerve  
1337 Growth Factor and Inflammatory Hyperalgesia: The Contribution of Tumour  
1338 Necrosis Factor Alpha." *British Journal of Pharmacology* 121 (3): 417–24.  
1339 <https://doi.org/10.1038/sj.bjp.0701148>.  
1340
- 1341 Xiong, Xunhao, Qingwen Xu, Yan Huang, Raman Deep Singh, Richard Anderson, Edward  
1342 Leof, Jinghua Hu, and Kun Ling. 2012. "An Association between Type I $\gamma$  PI4P 5-  
1343 Kinase and Exo70 Directs E-Cadherin Clustering and Epithelial Polarization."  
1344 *Molecular Biology of the Cell* 23 (1): 87–98. <https://doi.org/10.1091/mbc.E11-05-0449>.  
1345  
1346
- 1347 Xu, Haoxing, Markus Delling, Janice C. Jun, and David E. Clapham. 2006. "Oregano, Thyme  
1348 and Clove-Derived Flavors and Skin Sensitizers Activate Specific TRP Channels."  
1349 *Nature Neuroscience* 9 (5): 628–35. <https://doi.org/10.1038/nn1692>.  
1350
- 1351 Yin, Helen L., and Paul A. Janmey. 2003. "Phosphoinositide Regulation of the Actin  
1352 Cytoskeleton." *Annual Review of Physiology* 65: 761–89.  
1353 <https://doi.org/10.1146/annurev.physiol.65.092101.142517>.

- 1354  
1355 Zhong, Lixian, Richard Y. Hwang, and W. Daniel Tracey. 2010. "Pickpocket Is a DEG/ENaC  
1356 Protein Required for Mechanical Nociception in *Drosophila* Larvae." *Current Biology*  
1357 20 (5): 429–34. <https://doi.org/10.1016/j.cub.2009.12.057>.  
1358  
1359 Zimmerman, Amanda, Ling Bai, and David D. Ginty. 2014. "The Gentle Touch Receptors of  
1360 Mammalian Skin." *Science (New York, N.Y.)* 346 (6212): 950–54.  
1361 <https://doi.org/10.1126/science.1254229>.  
1362

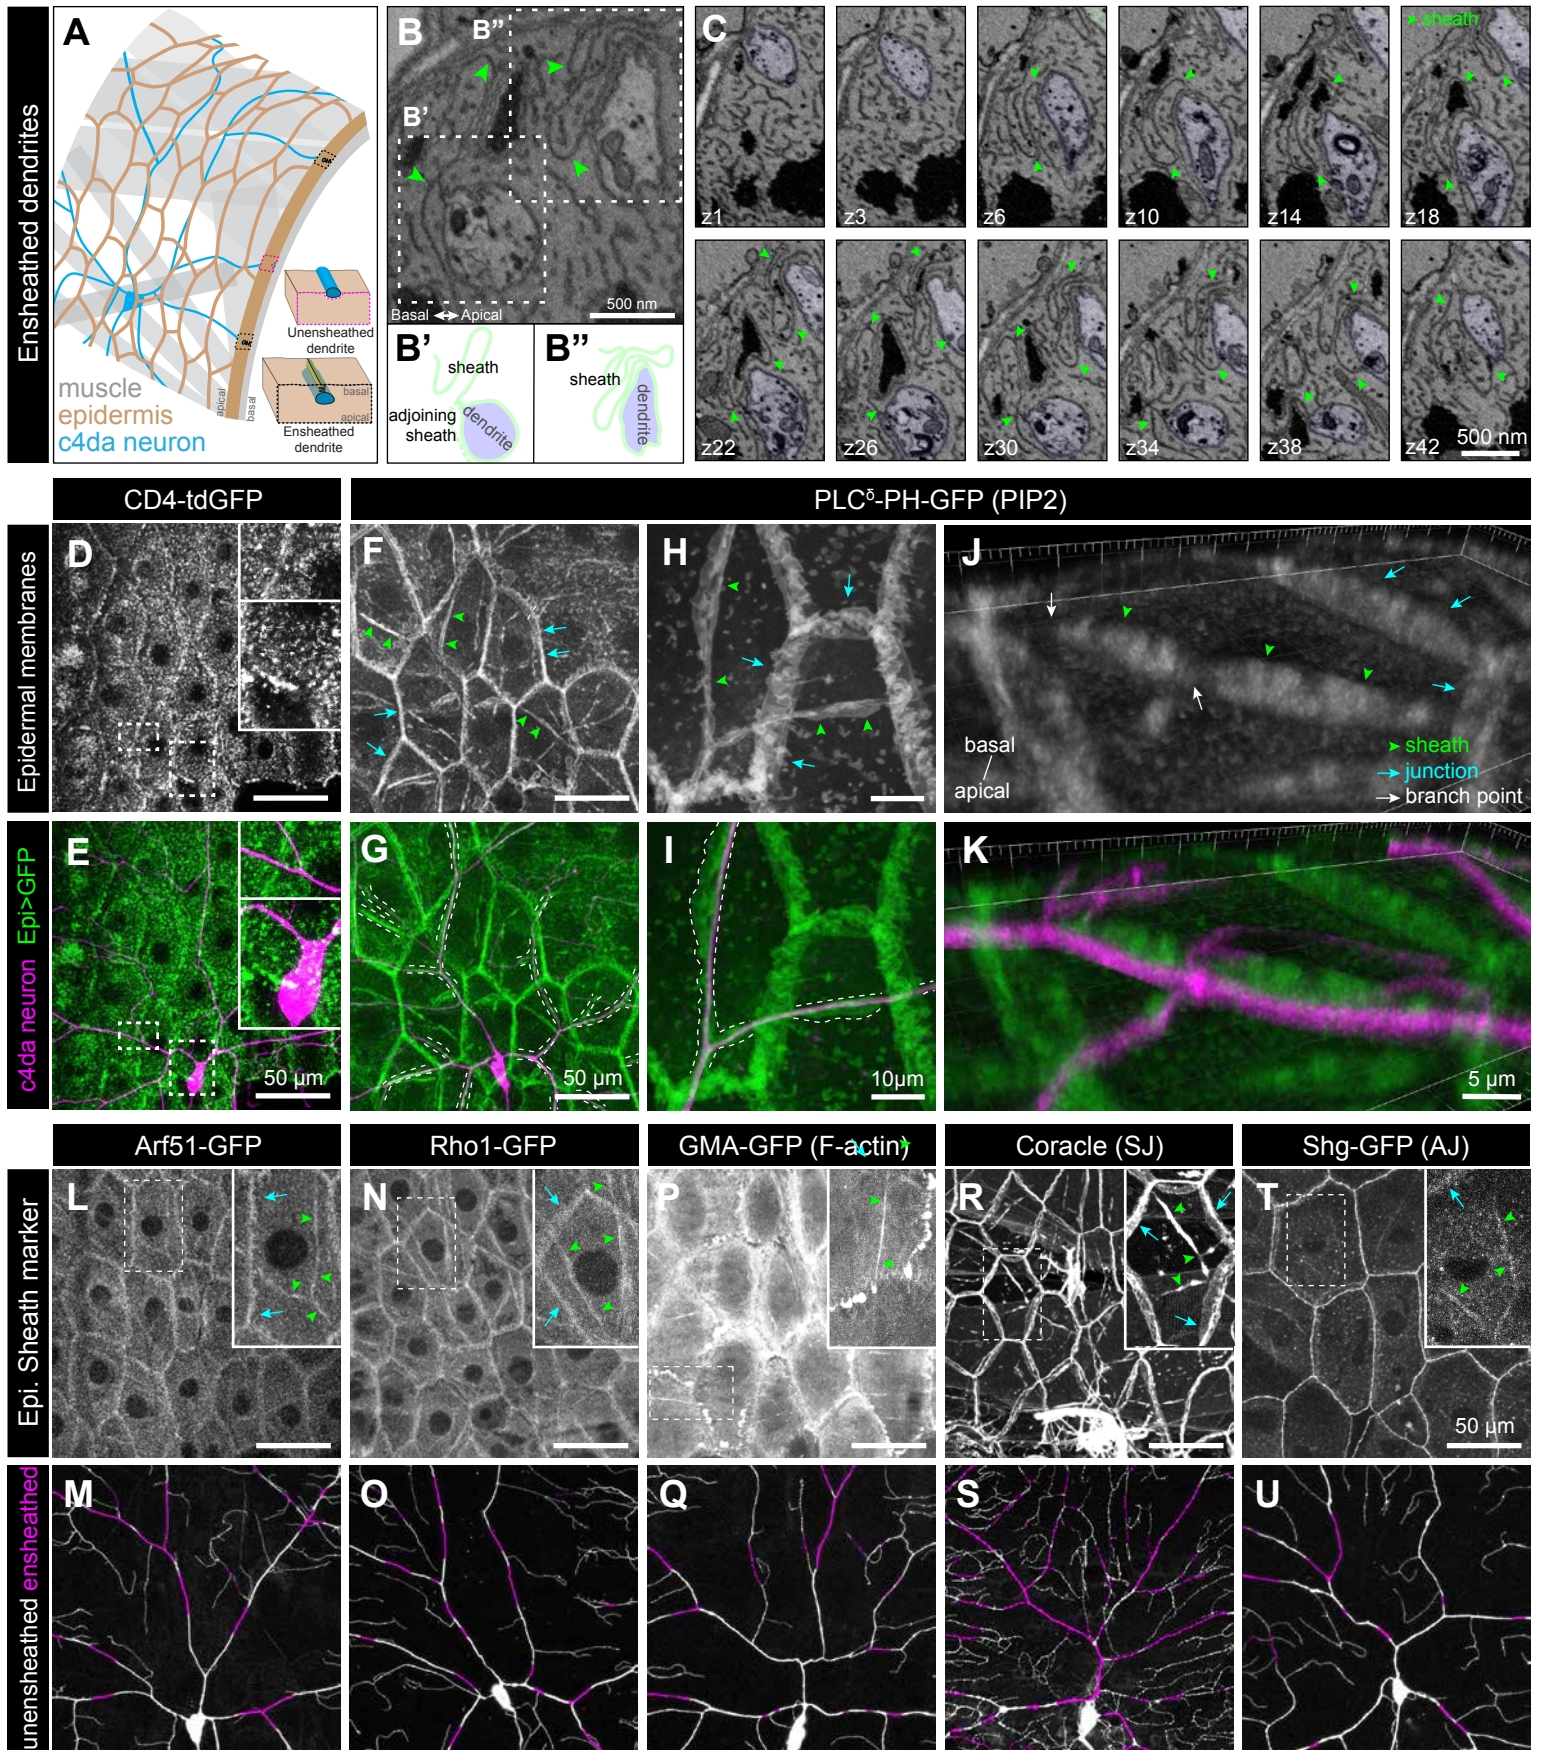

**Figure 1.** Epidermal PIP2 accumulation marks sites of dendrite ensheathment. (A) Schematic view of *Drosophila* larval body wall. Ensheathed and unensheathed dendrites are depicted in cross-section. (legend continued on next page)

**Figure 1.** Epidermal PIP2 accumulation marks sites of dendrite ensheathment. (B-C) SBF-SEM analysis of epidermal dendrite ensheathment. (B' and B'') Traces of da neuron dendrites and epidermal sheaths in cross-section. (C) Serial sections showing epidermal ensheathment (arrowheads mark sheaths) of da neuron dendrites (shaded green). The dendrite present in sections z1-z38 branches inside an epidermal sheath. See also Figure 1 – movie supplement 1. (D-E) Assay for markers of dendrite ensheathment. GFP-tagged markers were specifically expressed in the epidermis (A58-Gal4, Cha-Gal80) in larvae expressing the c4da-specific marker ppk-CD4-tdTomato. Maximum intensity projection of membrane-targeted CD4-tdGFP (D) and c4da dendrites (E) are shown. Insets show magnified views of c4da dendrites (top) and c4da soma (bottom). (F-K) Epidermal PLC $\delta$ -PH-GFP labels sites of dendrite ensheathment. Maximum intensity projections of epidermal PLC $\delta$ -PH-GFP (F, H, J) and overlay showing PLC $\delta$ -PH-GFP signal in green and ppk-CD4-tdTomato in magenta to label c4da dendrites (G, I, K). Hatched lines mark sheaths. (F-I) XY projections of live confocal images. (J-K) Expansion microscopy image showing epithelial PIP2 distribution at sites of c4da dendrite contact. Image shows a side view of a single epithelial cell and ensheathed c4da dendrites oriented along the apical-basal axis (apical, top). Note the discontinuities in the epithelial sheath at the dendrite branch point and at epithelial intracellular junctions (arrowheads). Scale bars have been divided by the measured expansion factor of  $\sim 4\times$  and therefore refers to pre-expansion dimensions. (L-U) Epidermal sheath markers. Maximum intensity projections show the distribution of the indicated GFP reporters in the epidermis of 120 h AEL larvae and composites show portions of c4da dendrite arbors (shaded purple) wrapped by sheaths labeled by the GFP reporters. Experimental genotypes of are available in Supplemental Table 2.

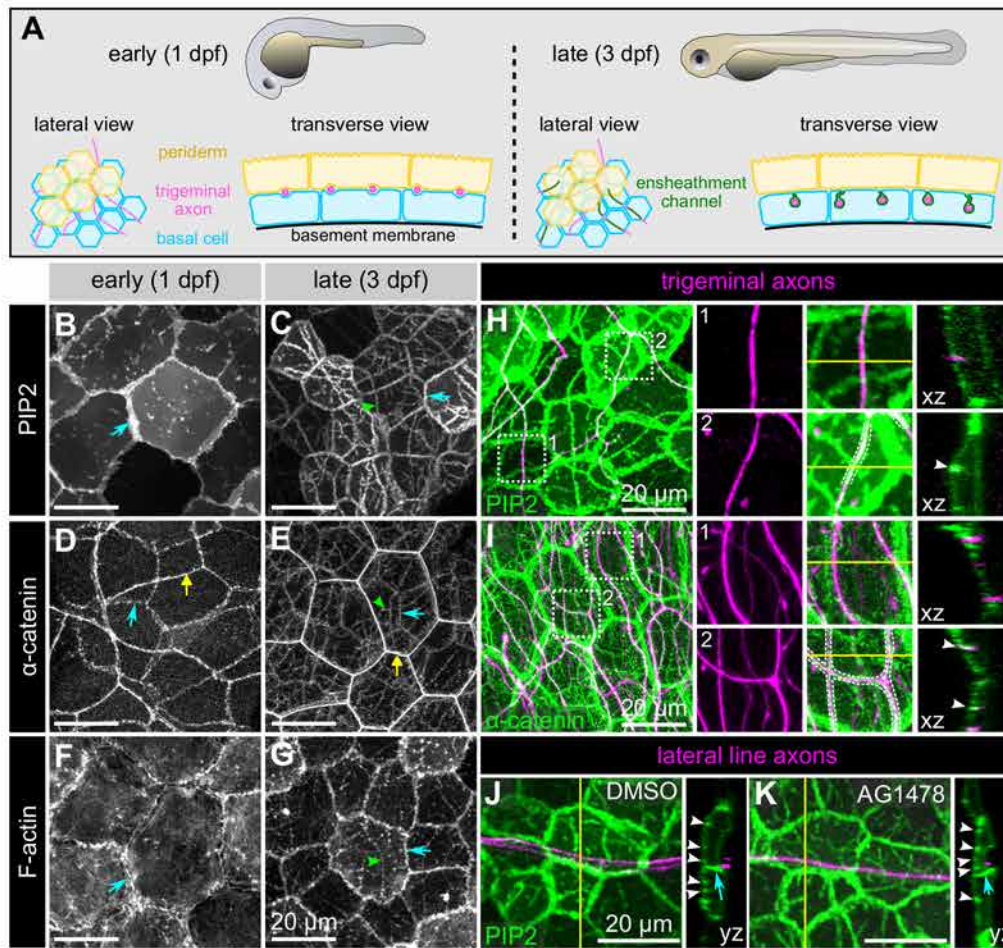

**Figure 2.** Molecular markers of epidermal sheaths in larval zebrafish. Schematic of the bilayered larval zebrafish epidermis at the indicated stages based on the ultrastructural analysis (O'Brien et al. 2012). (B-G) Maximum intensity projections of confocal z-stacks showing lateral views through the epidermis at 24 hpf (B,D,F) or 72 hpf (C,E,G). Fluorescent reporters for PIP2 (B-C),  $\alpha$ -catenin (D-E) and F-actin (F-G) are shown. Note the appearance of linear domains of each reporter through the apical basal cell membrane (green arrowheads) at the later time-point. Cyan arrows indicate basal lateral cell borders. Yellow arrows indicate periderm lateral cell borders. (H,I) Dual-labeling of epidermal sheaths and trigeminal sensory neurons. tdTomato-labeled trigeminal sensory neurons (magenta) together with the PIP2 reporter GFP-PH-PLC in basal cells at 46 hpf (H) or  $\alpha$ -catenin-Citrine in both periderm and basal cells (I) at 73 hpf. White dashed lines and arrowheads indicate examples of ensheathment channels containing labeled axons. Yellow lines indicate planes of orthogonal sections. (J,K) tdTomato-labeled posterior lateral line axons (magenta) labeled by transient injection of a *neurod:mTangerine* plasmid are shown together with GFP-PH-PLC signal in basal cells (green) at 78 hpf in either DMSO- or AG1478-treated embryos. AG1478 treatment prevents the repositioning of the posterior lateral line nerve below the epidermis (Raphael, Perlin, and Talbot 2010), resulting in the indentation of basal cell basal cell membranes, but did not trigger the accumulation of the PIP2 reporter GFP-PH-PLC. Arrowheads indicate ensheathment channels along the apical surface of basal cells. Blue arrows indicate basal cell lateral borders. Yellow lines indicate planes of orthogonal sections.

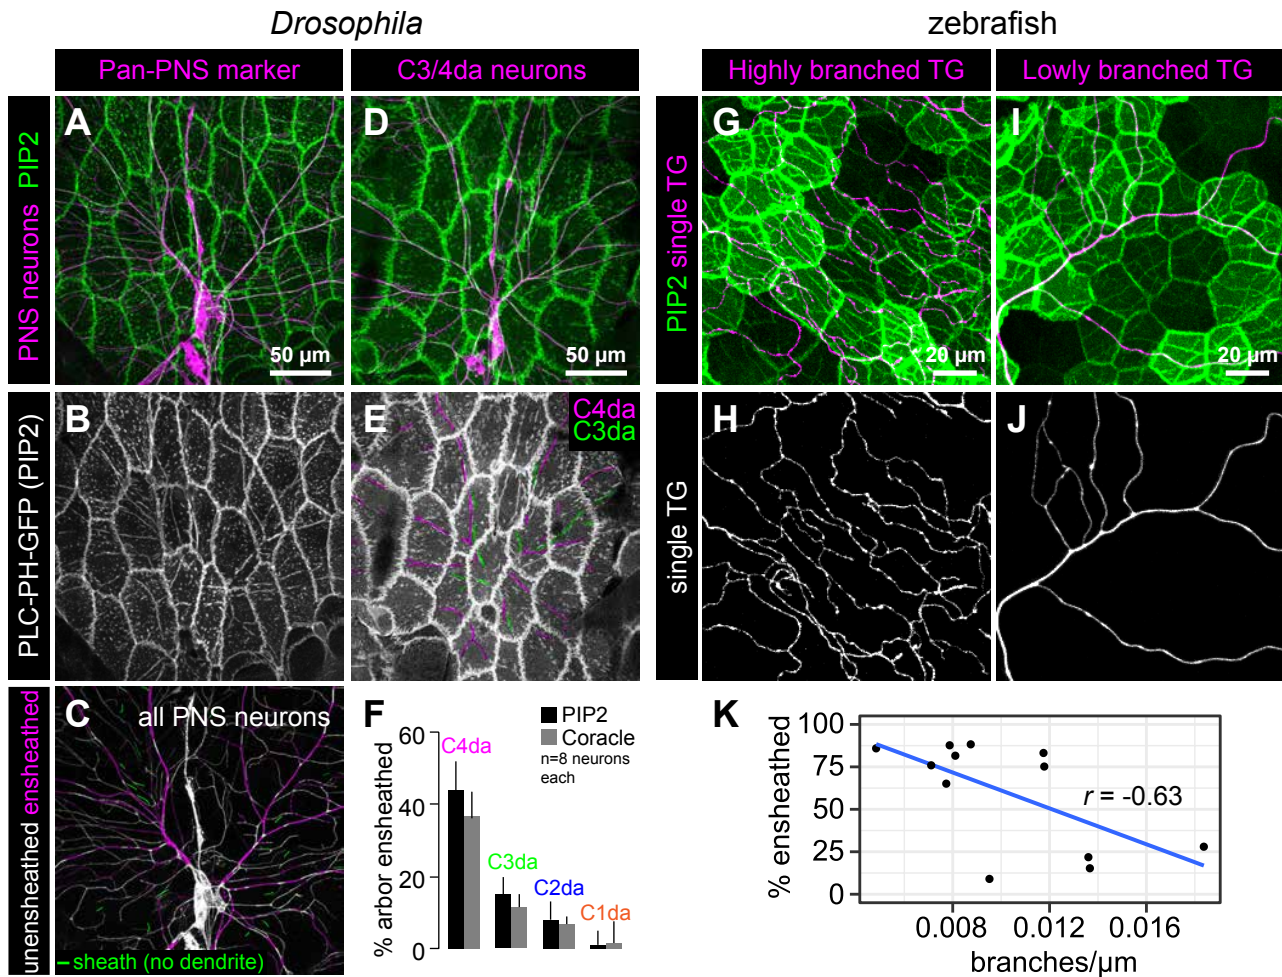

**Figure 3.** Epithelial sheaths form adjacent to somatosensory neurons in a modality-specific manner. (A-C) Dual-labelling of epithelial sheaths and all somatosensory neurons. Maximum projections of confocal stacks show (A) mRFP-labeled sensory neurons (magenta) together with epidermal PLC $\delta$ -PH-GFP signal (green) or (B) epidermal PLC  $\delta$ -PH-GFP signal on its own. (C) PLC $\delta$ -PH-GFP-positive sheaths are pseudocolored with dendrite-associated sheaths shaded in magenta and sheaths without apposed dendrites shaded in green. (D-E) Dual-labeling of epithelial sheaths and c3da/c4da sensory neurons. (D) tdTomato-labeled c3da and c4da neurons (magenta) are shown together with epidermal PLC $\delta$ -PH-GFP signal (green). (E) Image showing epidermal PLC $\delta$ -PH-GFP signal with c3da-containing sheaths shaded green and c4da-containing sheaths shaded magenta. (F) Histogram depicting mean and standard deviation values for the portion of the dendrite arbor of different classes of da neurons ensheathed by the epidermis using PLC $\delta$ -PH-GFP or coracle immunostaining as a marker for ensheathment. (G-K) The extent of ensheathment was inversely correlated with trigeminal (TG) axon complexity in zebrafish. Examples of single TG neurons labeled by transient injection of *Tg(isl1[ss]:L-EXA-VP16,LEXAop:tdTomato)* with high (G,H) or low (I,J) branch density. (K) Scatterplot of axon branches versus percent of axon length ensheathed from tracings of 12 individual TG neurons. Note the inverse linear regression (blue line).

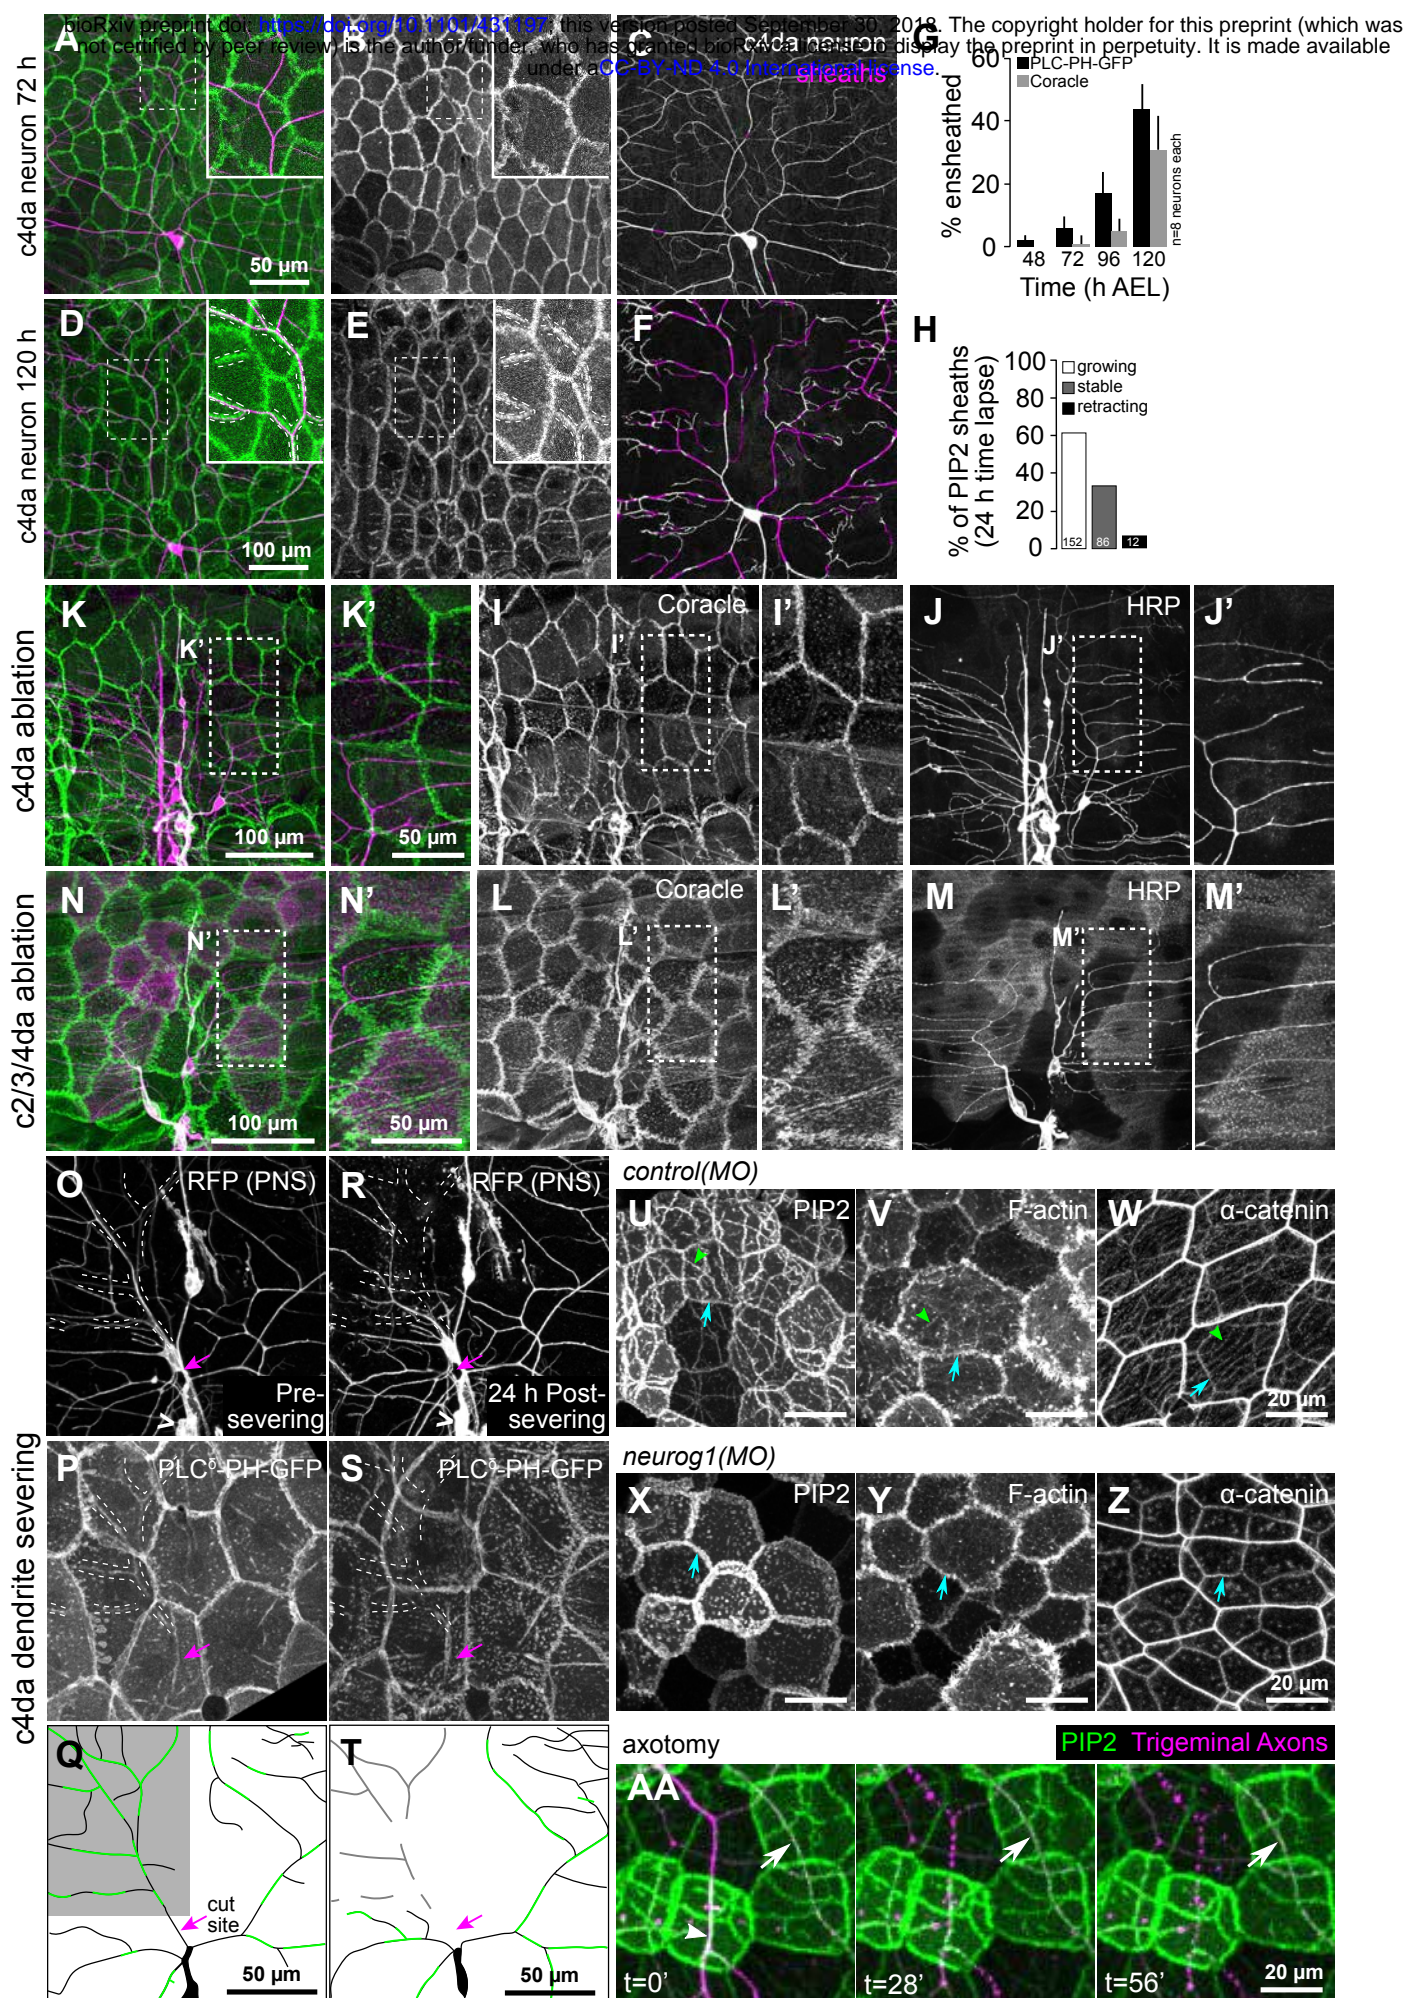



**Figure 4.** Somatosensory neurons are necessary for formation and maintenance of epidermal sheaths. (A-G) Time-course of sheath formation. Maximum intensity projections show dual labeling of sheaths by epidermal PLC $\delta$ -PH-GFP and the c4da-specific marker ppk-CD4-tdTomato (A, D) or PLC $\delta$ -PH-GFP signal alone (B, E) at 72 and 120 h AEL. (C, F) Composites show portions of c4da dendrite arbors (shaded purple) wrapped by sheaths labeled by PLC $\delta$ -PH-GFP. (G) Plots show mean and standard deviation values for the proportion of c4da dendrite arbors wrapped by PLC $\delta$ -PH-GFP or coracle-positive sheaths. See also Figure 4 – figure supplement 2 for images of coracle labeling of sheaths at 72 and 120 h AEL. (H) Once formed, sheaths persist. Plot shows sheath dynamics; the proportion of sheaths from 8 neurons that grew, retracted or were stable over a 24 h time-lapse is shown. See also Figure 4 – figure supplement 1 for time-lapse images. (I-K) Epidermal sheath formation following genetic ablation of c4da neurons. Maximum intensity projections show dual labeling of anti-cora staining to label sheaths and anti-HRP staining to label PNS neurons (I) and the individual markers alone (J, K) at 120 h AEL for a larva expressing the pro-apoptotic gene reaper (rpr) specifically in c4da neurons under control of ppk-Gal4. (L-N) Epidermal sheath formation following laser ablation of larval c2da, c3da, and c4da neurons. Images show dual labeling of epidermal sheaths with anti-cora staining and sensory neurons with anti-HRP staining (L) and the individual markers alone (M, N) at 120 h AEL in a hemisegment in which c2da, c3da, and c4da were ablated with a focused laser beam at 72 h AEL. (O-T) Somatosensory dendrites are required for sheath maintenance. Maximum projections of confocal stacks show time-lapse images of da neurons labeled with membrane-targeted mRFP (O) and epidermal sheaths (P) immediately prior to c4da dendrite severing at 108 h AEL and 12 h post-severing at 120 h AEL (R, S). White dashed lines outline the anterior-dorsal portions of the c4da arbor that are ensheathed prior to severing and the location those sheaths would occupy if they persisted post-severing. (Q, T) Traces depict unensheathed c4da dendrites in black and ensheathed c4da dendrites in green, the arrow marks the site of dendrite severing, and the gray box marks the quadrant in which c4da dendrites and associated epidermal sheaths are lost post-severing. (U-Z) Epidermal sheath formation in zebrafish injected of a morpholino targeting neurog1 to prevent somatosensory neuron development. Maximum intensity projections of confocal z-stacks showing lateral views through the zebrafish epidermis at 72 hpf. Note the lack of ensheathment channels (green arrowheads) in neurog1(MO)-injected embryos. Yellow and cyan arrows indicate the lateral cell membranes of periderm and basal cells, respectively. (AA) Somatosensory axons are required for sheath maintenance in zebrafish.

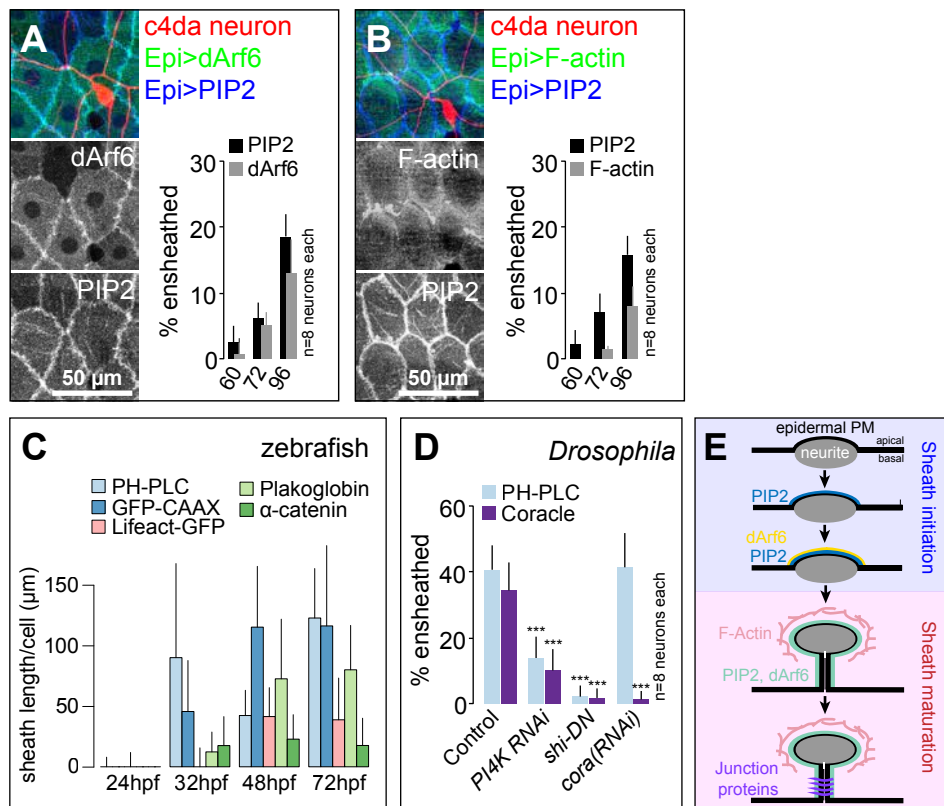

**Figure 5.** Sequence of events in sheath assembly. (A-B) Time of arrival of PIP2 and other sheath markers. Images show dual labeling of sheaths by PLC $\delta$ -PH-Cerulean and dArf6-GFP (A) or GMA-GFP to label F-actin (B) in larvae additionally expressing the c4da-specific marker ppk-CD4-tdTomato. Plots show the mean and standard deviation values for the proportion of c4da dendrite arbors ensheathed by structures labeled by the indicated markers at the indicated times. All sheath structures labeled by dArf6-GFP and GMA-GFP were labeled by PLC $\delta$ -PH-Cerulean. (C) Timing of accumulation of ensheathment channel markers in the zebrafish epidermis. (D) Epistatic relationship between markers. The indicated RNAi transgenes were expressed in the epidermis and effects on ensheathment were assessed (see Figure 5 – figure supplement 2 for accompanying images). Plots show mean and standard deviation values for the proportion of c4da dendrite arbors wrapped by PLC $\delta$ -PH-GFP or coracle-positive sheaths. n = 8 neurons each; ; \*\*\*P<0.001 relative to control; one way ANOVA with post-hoc Dunnett’s test.

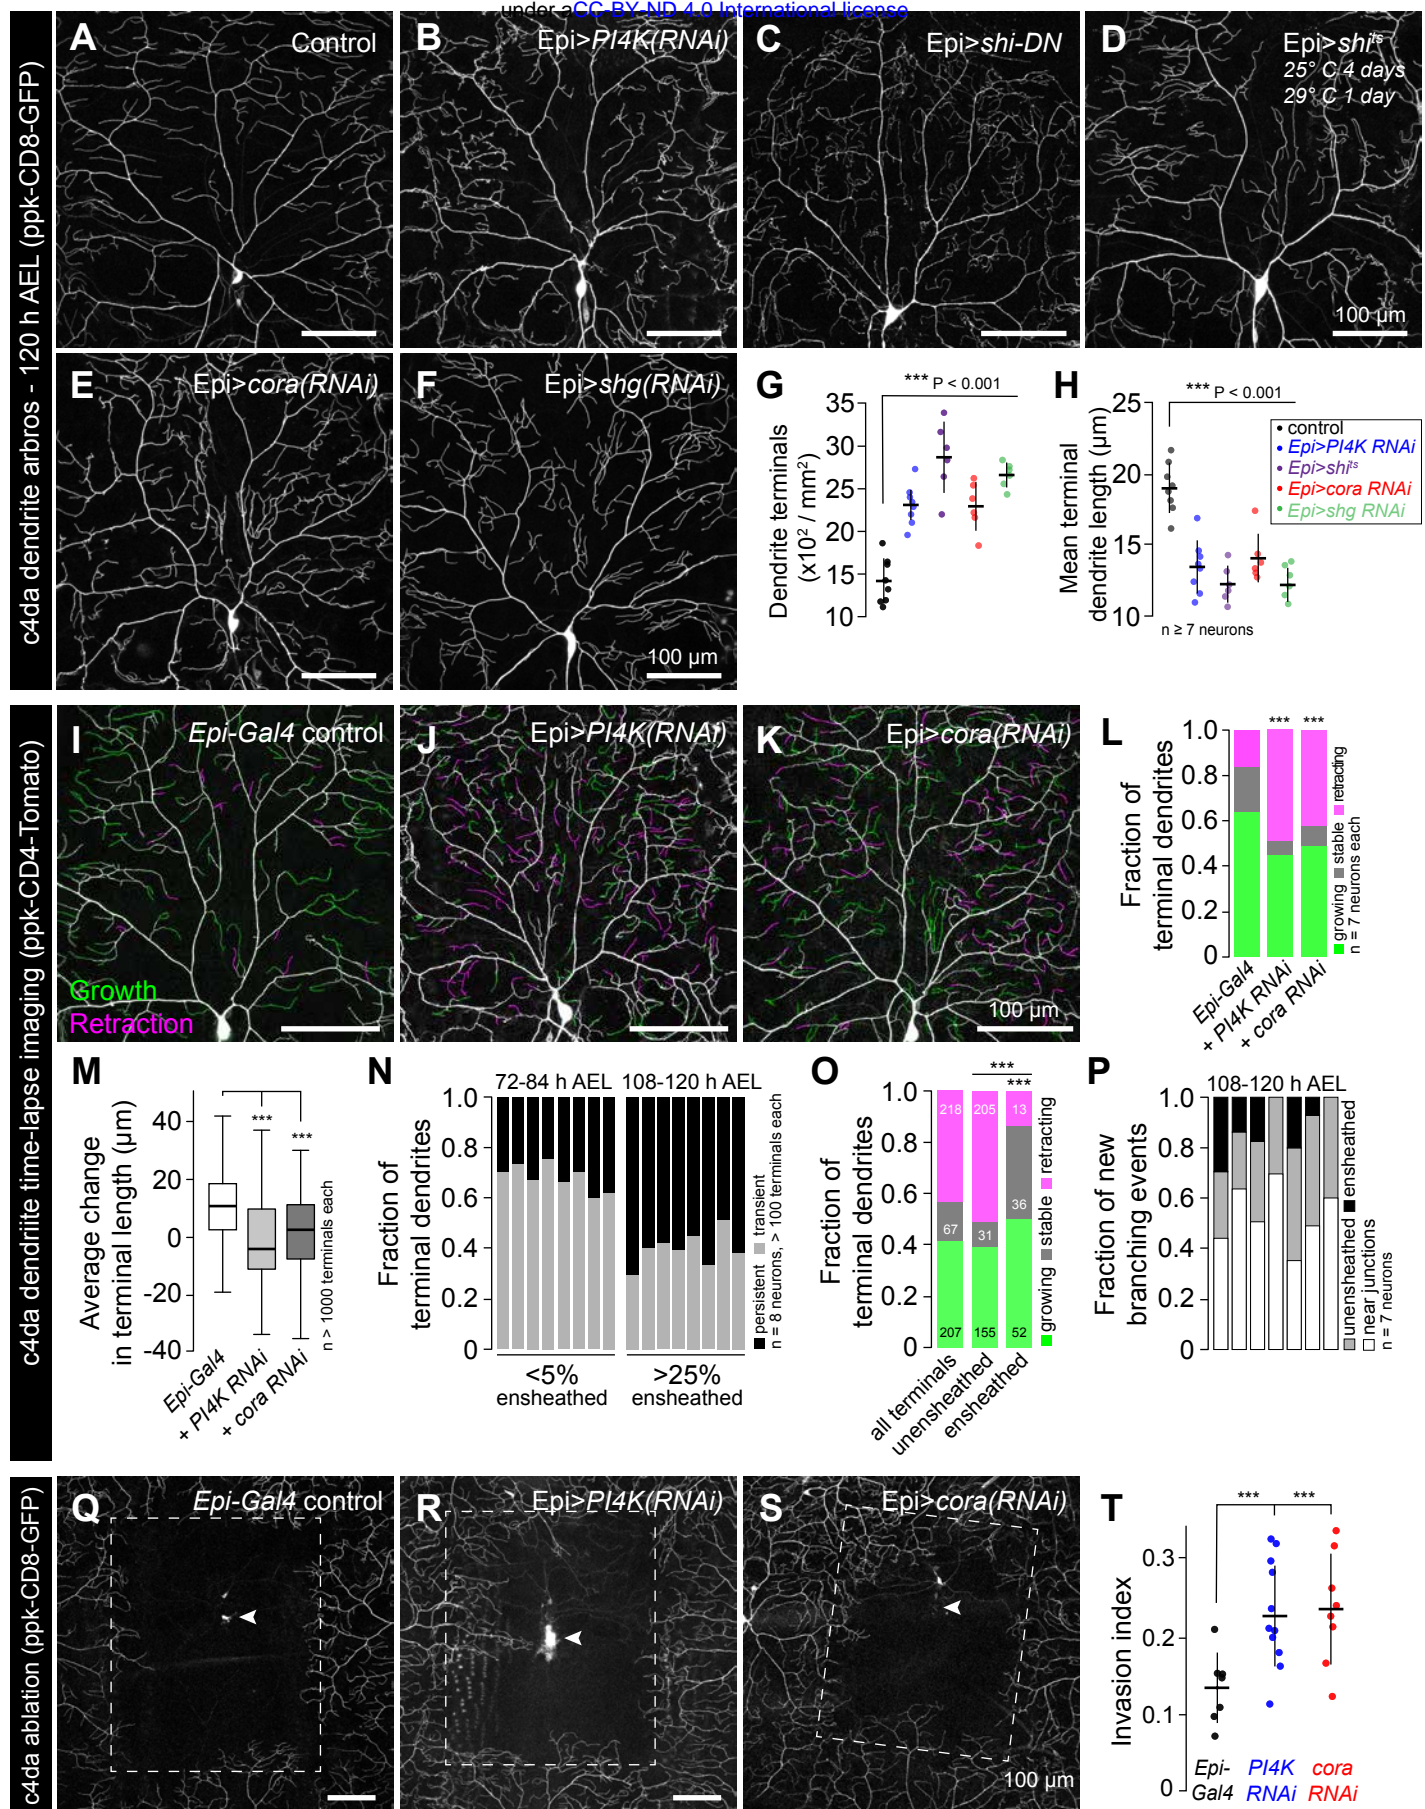

**Figure 6. Epidermal sheaths regulate branching morphogenesis in nociceptive c4da neurons.** Representative images of 120 h AEL c4da neurons from (A) control larvae and larvae expressing (B) *PI4K(RNAi)*, (C) dominant-negative *shibire* (*shiDN*), (D) temperature-sensitive *shibire* (*shi<sup>ts</sup>*), (E) *cora(RNAi)*, (F) *shg(RNAi)*. Quantification of dendrite terminal density (G) and mean terminal length (H) shows significant differences (\*\*\* P < 0.001) between control and RNAi conditions. Time-lapse imaging (I-K) shows growth (green) and retraction (magenta) of terminal dendrites. Quantification (L) shows the fraction of terminal dendrites in different states: growing, stable, and retracting. Box plot (M) shows the average change in terminal length ( $\mu\text{m}$ ) for control, *PI4K RNAi*, and *cora RNAi* conditions. Stacked bar chart (N) shows the fraction of terminal dendrites in different states (persistent, transient, ensheathed) at different ages (72-84 h AEL and 108-120 h AEL). Stacked bar chart (O) shows the fraction of terminal dendrites in different states (growing, stable, retracting) for all terminals, unensheathed, and ensheathed. Stacked bar chart (P) shows the fraction of new branching events (near junctions, unensheathed, ensheathed) at 108-120 h AEL. Representative images of c4da ablation (Q-S) show the effect of *PI4K RNAi* and *cora RNAi* on dendrite branching. Scatter plot (T) shows the invasion index for control, *PI4K RNAi*, and *cora RNAi* conditions. (legend continued on next page)

**Figure 6.** Epidermal sheaths regulate branching morphogenesis in nociceptive c4da neurons. Representative images of 120 h AEL c4da neurons from (A) control larvae and larvae expressing (B) *PI4K(RNAi)*, (C) dominant-negative *shibire* (*shi<sup>DN</sup>*), (D) temperature-sensitive *shibire* (*shi<sup>ts</sup>*), (E) epidermal *cora(RNAi)*, and (F) epidermal *shg(RNAi)* larvae are shown. Larvae were reared at 25° C with the exception of larvae in (D) which were reared at 25° C for 4 days and then shifted to the non-permissive temperature 29° C for 1 day prior to imaging. (G-H) Morphometric analysis of dendrites from c4da neurons of the indicated genotypes. Plots show mean and standard deviation for (G) the number of terminal branches and (H) terminal branch length. Data points, measurements from an individual neuron; \*\*\*P<0.001 relative to control; one way ANOVA with post-hoc Dunnett's test. (I-L) Time-lapse analysis of epidermal sheath control of terminal dendrite dynamics. C4da neurons were imaged over an 18 h time-lapse (96-114 h AEL) and growth (green) and retraction (magenta) were pseudocolored in a composite of the two time-points. Representative composite images are shown for c4da neurons from (I) Gal4-only control, (J) epidermal *PI4K(RNAi)* and (K) epidermal *cora(RNAi)* larvae. (L-P) Quantification of terminal dendrite dynamics. (L) The fraction of terminal dendrites that were growing, stable, or retracting over the time-lapse is shown. \*\*\*P<0.001 compared to controls, Chi-square analysis. (M) Epidermal ensheathment regulates the extent of terminal dendrite dynamics. Box plots depict mean values and 1st/3rd quartile, whiskers mark minimum/maximum values. \*\*\*P<0.001 compared to Epi-Gal4 control; one way ANOVA with post-hoc Dunnett's test. (N) Epidermal ensheathment regulates dendrite turnover. C4da neurons were imaged over a 12 h time-lapse (72-84 or 108-120 h AEL) and all terminal dendrites were scored as persistent (present at both time points) or transient. Each bar represents measurements from a single neuron. Terminal dendrites at the later time-point, when c4da neurons are extensively ensheathed, were significantly more likely to persist. (O) Quantification of terminal dynamics in ensheathed and unensheathed terminal dendrites from 108-120 h AEL. \*\*\*P<0.001, Chi-square analysis with post-hoc Bonferroni adjustment for multiple comparisons. Pairwise comparisons are indicated. (P) Distribution of branching events during 12 h time-lapse imaging. Each bar represents a single neuron. (Q-T) Epidermal ensheathment regulates dendrite structural plasticity. Class IV neurons in newly eclosed 2nd instar control (Q), epidermis *PI4k(RNAi)* (R), and epidermis *cora(RNAi)* (S) larvae were ablated with a focused laser beam and imaged 48hr post-ablation. Images depict dendrite growth of spared neurons into unoccupied territory following laser ablation and hatched boxes demarcate the territory occupied by the ablated neuron. (T) Scatter plot depicting mean and standard deviation for dendrite invasion of the indicated mutants. The number of samples analyzed for each treatment is indicated. \*\*\*P<0.001 relative to control; one way ANOVA with post-hoc Dunnett's test. .

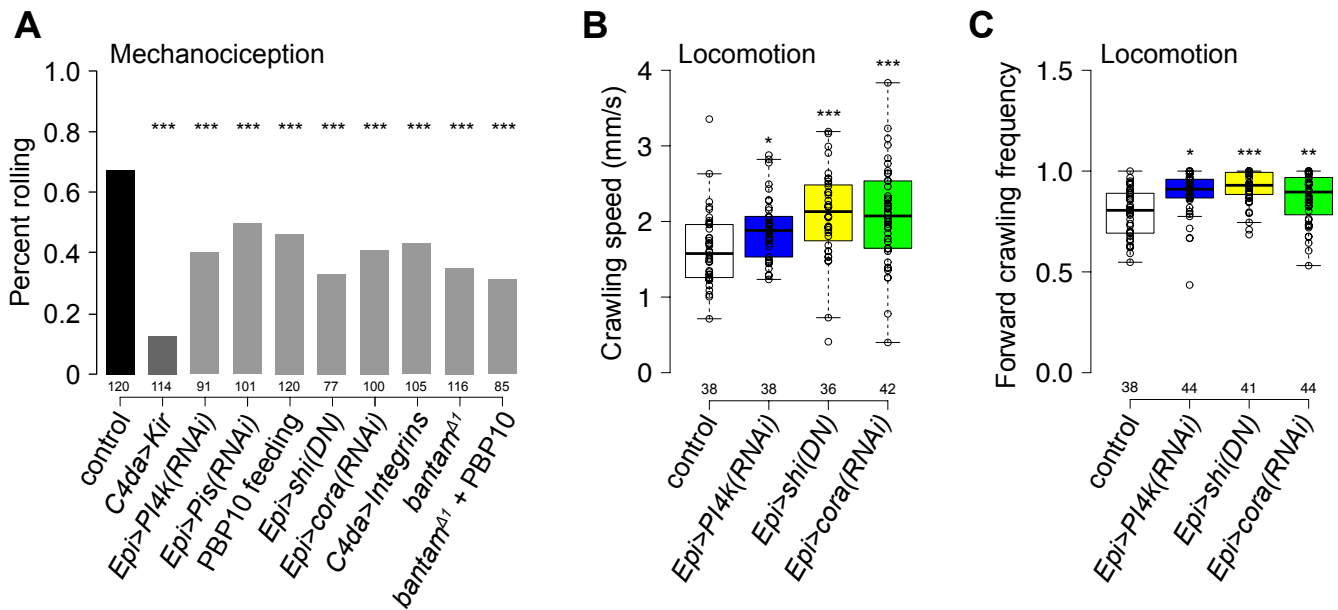

**Figure 7.** Epidermal dendrite ensheathment regulates nociceptive sensitivity. (A) Epidermal ensheathment regulates mechanonociception. Bars depict the proportion of larvae of the indicated genotype that exhibited a nocifensive rolling response to 70 mN von Frey fiber stimulation. *UAS-Kir2.1* expression in *c4da* neurons blocked nociceptive responses to 70 mN stimulus, demonstrating that the response is mediated by *c4da* neurons, and treatments that reduced epidermal ensheathment significantly reduced the frequency of nociceptive rolling responses. \*\*\* $P < 0.001$ , compared to wt controls, Chi square test. (B-C) Epidermal ensheathment regulates the rate of larval locomotion. Box plots depict crawling speed (B) and the proportion of time larvae spent in forward-directed locomotion (C) for larvae of the indicated genotype. \*\*\* $P < 0.001$ , \* $P < 0.05$ , Ns, not significant compared to wild type controls, Kruskal-Wallis rank sum test. The number of larvae tested is shown for each condition.
